# Supplementary material for: Controlled partial transfer hydrogenation of quinolines by cobalt-amido cooperative catalysis
Source: PubMed Central journal article supplement (PMC7060234; doi:10.1038/s41467-020-15118-x), 2020-03-06
Supplement: 41467_2020_15118_MOESM2_ESM.pdf [file 41467_2020_15118_MOESM2_ESM.pdf]

## Description of Additional Supplementary Files

File Name: Supplementary Data 1

Description: Cartesian coordinates for all computed structures.
