# Supplementary material for: Controlled partial transfer hydrogenation of quinolines by cobalt-amido cooperative catalysis
Source: PubMed Central journal article supplement (PMC7060234; doi:10.1038/s41467-020-15118-x), 2020-03-06
Supplement: 41467_2020_15118_MOESM3_ESM.pdf [file 41467_2020_15118_MOESM3_ESM.pdf]

## Cartesian coordinates for all computed structures

### Quinoline

|   |              |              |              |
|---|--------------|--------------|--------------|
| C | -2.415608000 | -0.964661000 | -0.013640000 |
| C | -1.038771000 | -0.940771000 | -0.013830000 |
| C | -0.340651000 | 0.296141000  | -0.013739000 |
| C | -1.091026000 | 1.516193000  | -0.013435000 |
| C | -2.509710000 | 1.458361000  | -0.013239000 |
| C | -3.157898000 | 0.243680000  | -0.013343000 |
| H | -2.942483000 | -1.914496000 | -0.013719000 |
| H | -0.449027000 | -1.851634000 | -0.014058000 |
| C | -0.361937000 | 2.733204000  | -0.013338000 |
| H | -3.073128000 | 2.388191000  | -0.013005000 |
| H | -4.243275000 | 0.205585000  | -0.013195000 |
| C | 1.012235000  | 2.693674000  | -0.013536000 |
| C | 1.657189000  | 1.429524000  | -0.013838000 |
| H | -0.899337000 | 3.678377000  | -0.013110000 |
| H | 1.605657000  | 3.602431000  | -0.013466000 |
| H | 2.746216000  | 1.385272000  | -0.013984000 |
| N | 1.025904000  | 0.272681000  | -0.013926000 |

### Quinoline·BH3

|   |              |              |              |
|---|--------------|--------------|--------------|
| C | 2.419572000  | -0.693977000 | -0.000004000 |
| C | 1.240582000  | -1.408361000 | -0.000008000 |
| C | 0.002170000  | -0.721810000 | -0.000007000 |
| C | -0.007580000 | 0.707933000  | -0.000001000 |
| C | 1.227531000  | 1.408197000  | 0.000003000  |
| C | 2.419314000  | 0.721303000  | 0.000002000  |
| H | 3.365204000  | -1.227589000 | -0.000005000 |
| H | 1.236887000  | -2.489396000 | -0.000012000 |
| C | -1.254822000 | 1.379314000  | -0.000001000 |
| H | 1.209907000  | 2.494457000  | 0.000007000  |
| H | 3.361399000  | 1.260792000  | 0.000005000  |
| C | -2.416020000 | 0.644999000  | -0.000005000 |
| C | -2.336152000 | -0.760439000 | -0.000010000 |
| H | -1.275699000 | 2.465589000  | 0.000004000  |
| H | -3.391923000 | 1.116940000  | -0.000004000 |
| H | -3.226211000 | -1.377615000 | -0.000014000 |
| N | -1.187818000 | -1.429441000 | -0.000011000 |
| B | -1.212736000 | -3.050178000 | -0.000017000 |
| H | -0.630814000 | -3.401358000 | -1.005546000 |
| H | -0.630817000 | -3.401366000 | 1.005511000  |
| H | -2.381256000 | -3.362527000 | -0.000021000 |

**H<sub>3</sub>N·BH<sub>3</sub>**

|   |              |              |              |
|---|--------------|--------------|--------------|
| N | 0.000000000  | 0.000000000  | 0.732404000  |
| H | -0.558890000 | 0.769570000  | 1.096798000  |
| H | 0.945912000  | 0.099228000  | 1.096798000  |
| H | -0.387022000 | -0.868798000 | 1.096798000  |
| B | 0.000000000  | 0.000000000  | -0.938223000 |
| H | 0.476463000  | 1.070595000  | -1.242035000 |
| H | 0.688931000  | -0.947927000 | -1.242035000 |
| H | -1.165394000 | -0.122668000 | -1.242035000 |

**Catalyst1**

|    |              |              |              |
|----|--------------|--------------|--------------|
| Co | -1.378975000 | 0.603532000  | -0.163274000 |
| P  | 0.651070000  | -0.230784000 | -0.032970000 |
| N  | -0.541899000 | 2.253074000  | -0.425400000 |
| C  | -3.410804000 | 1.046635000  | -0.435006000 |
| C  | -3.188869000 | 0.851065000  | 0.981041000  |
| C  | 0.814910000  | 2.428378000  | -0.334969000 |
| C  | -3.148750000 | -0.188425000 | -1.110116000 |
| C  | 3.025818000  | 1.393557000  | -0.013136000 |
| C  | 1.636163000  | 1.287510000  | -0.115499000 |
| C  | -2.657717000 | -1.102278000 | -0.134147000 |
| C  | 1.229772000  | -1.314765000 | -1.398199000 |
| C  | 1.130587000  | -1.107033000 | 1.505135000  |
| C  | 1.477088000  | 3.676802000  | -0.440456000 |
| H  | 0.889200000  | 4.576430000  | -0.609151000 |
| C  | -2.719185000 | -0.467065000 | 1.171867000  |
| C  | 3.669353000  | 2.627914000  | -0.112596000 |
| C  | -3.924970000 | 2.305360000  | -1.069641000 |
| H  | -3.589045000 | 3.192005000  | -0.522820000 |
| H  | -5.022136000 | 2.331118000  | -1.084857000 |
| H  | -3.577476000 | 2.399601000  | -2.102593000 |
| C  | -2.277090000 | -2.535818000 | -0.374963000 |
| H  | -1.803963000 | -2.672386000 | -1.350975000 |
| H  | -3.157550000 | -3.189841000 | -0.334706000 |
| H  | -1.573545000 | -2.890083000 | 0.382572000  |
| C  | 0.454207000  | -1.362035000 | -2.565867000 |
| H  | -0.473161000 | -0.797971000 | -2.602673000 |
| C  | -3.346264000 | -0.452804000 | -2.574903000 |
| H  | -3.034383000 | 0.401387000  | -3.184667000 |
| H  | -4.400761000 | -0.652074000 | -2.807752000 |
| H  | -2.773134000 | -1.323404000 | -2.905687000 |
| C  | -3.376170000 | 1.906761000  | 2.031053000  |
| H  | -2.872244000 | 1.637046000  | 2.962392000  |
| H  | -4.438338000 | 2.062963000  | 2.258684000  |
| H  | -2.965014000 | 2.866451000  | 1.702245000  |
| C  | 2.857843000  | 3.759162000  | -0.329520000 |

|   |              |              |              |
|---|--------------|--------------|--------------|
| H | 3.331683000  | 4.735731000  | -0.413280000 |
| C | 1.436900000  | -0.354466000 | 2.649793000  |
| H | 1.506138000  | 0.726719000  | 2.575158000  |
| C | 0.871495000  | -2.118397000 | -3.662076000 |
| H | 0.262608000  | -2.147996000 | -4.561270000 |
| C | 2.432497000  | -2.036088000 | -1.345228000 |
| H | 3.038915000  | -2.014760000 | -0.444679000 |
| C | -2.368307000 | -1.123689000 | 2.475535000  |
| H | -1.520833000 | -1.805047000 | 2.369108000  |
| H | -3.212064000 | -1.704748000 | 2.870878000  |
| H | -2.090293000 | -0.385956000 | 3.232813000  |
| C | 1.052423000  | -2.504897000 | 1.609533000  |
| H | 0.824338000  | -3.102021000 | 0.732103000  |
| C | 1.659100000  | -0.988244000 | 3.871959000  |
| H | 1.898375000  | -0.394432000 | 4.749589000  |
| C | 2.066356000  | -2.837893000 | -3.599446000 |
| H | 2.390351000  | -3.431033000 | -4.449885000 |
| C | 2.845796000  | -2.794994000 | -2.440115000 |
| H | 3.776782000  | -3.352583000 | -2.389225000 |
| C | 1.277730000  | -3.136140000 | 2.834194000  |
| H | 1.218190000  | -4.218861000 | 2.900097000  |
| C | 1.578247000  | -2.379786000 | 3.968572000  |
| H | 1.751798000  | -2.871514000 | 4.921357000  |
| H | 3.617202000  | 0.495203000  | 0.153833000  |
| H | -1.059047000 | 3.115788000  | -0.556315000 |
| C | 5.169533000  | 2.758967000  | 0.004571000  |
| H | 5.611894000  | 3.186443000  | -0.903970000 |
| H | 5.457302000  | 3.412945000  | 0.837360000  |
| H | 5.641638000  | 1.785989000  | 0.172859000  |

### Int1

|    |              |              |              |
|----|--------------|--------------|--------------|
| Co | -1.356607000 | -0.094820000 | -0.374336000 |
| P  | 0.729902000  | 0.299991000  | 0.205744000  |
| N  | -0.652407000 | -1.334786000 | -1.605328000 |
| C  | -2.948640000 | 0.117239000  | 1.091300000  |
| C  | -3.429099000 | -0.522561000 | -0.078953000 |
| C  | 0.709525000  | -1.537957000 | -1.763890000 |
| C  | -2.428891000 | 1.401563000  | 0.691113000  |
| C  | 2.974198000  | -1.101638000 | -0.928260000 |
| C  | 1.598012000  | -0.872640000 | -0.881736000 |
| C  | -2.657292000 | 1.586903000  | -0.711711000 |
| C  | 1.347713000  | 0.039266000  | 1.904954000  |
| C  | 1.318774000  | 1.965294000  | -0.305740000 |
| C  | 1.279365000  | -2.406395000 | -2.720334000 |
| H  | 0.632095000  | -2.917866000 | -3.430222000 |
| C  | -3.237188000 | 0.377426000  | -1.197377000 |

|   |              |              |              |
|---|--------------|--------------|--------------|
| C | 3.533440000  | -1.978710000 | -1.861871000 |
| C | -3.034030000 | -0.393381000 | 2.500231000  |
| H | -2.924977000 | -1.479825000 | 2.543932000  |
| H | -3.998522000 | -0.131479000 | 2.955824000  |
| H | -2.250887000 | 0.039227000  | 3.128433000  |
| C | -2.297386000 | 2.807080000  | -1.510304000 |
| H | -1.354642000 | 3.243178000  | -1.167003000 |
| H | -3.070268000 | 3.583868000  | -1.440121000 |
| H | -2.172120000 | 2.565030000  | -2.569499000 |
| C | 0.588339000  | -0.794965000 | 2.738321000  |
| H | -0.332849000 | -1.231098000 | 2.368610000  |
| C | -1.886541000 | 2.433782000  | 1.636948000  |
| H | -1.247289000 | 1.981584000  | 2.401269000  |
| H | -2.705470000 | 2.947970000  | 2.155579000  |
| H | -1.299833000 | 3.189372000  | 1.111538000  |
| C | -4.033681000 | -1.895422000 | -0.147260000 |
| H | -3.825824000 | -2.374286000 | -1.110325000 |
| H | -5.124880000 | -1.861022000 | -0.036244000 |
| H | -3.636574000 | -2.537009000 | 0.644361000  |
| C | 2.655034000  | -2.611226000 | -2.758985000 |
| H | 3.063656000  | -3.287985000 | -3.506874000 |
| C | 1.591382000  | 2.198960000  | -1.663231000 |
| H | 1.566239000  | 1.370598000  | -2.364871000 |
| C | 1.036306000  | -1.095401000 | 4.025166000  |
| H | 0.447213000  | -1.755308000 | 4.654502000  |
| C | 2.562774000  | 0.566193000  | 2.372642000  |
| H | 3.157737000  | 1.213818000  | 1.735769000  |
| C | -3.616941000 | 0.087811000  | -2.620151000 |
| H | -2.969236000 | 0.620584000  | -3.322024000 |
| H | -4.651613000 | 0.387479000  | -2.828367000 |
| H | -3.541901000 | -0.980950000 | -2.845168000 |
| C | 1.361240000  | 3.043463000  | 0.591562000  |
| H | 1.157245000  | 2.880783000  | 1.644557000  |
| C | 1.896756000  | 3.483442000  | -2.111636000 |
| H | 2.107390000  | 3.649158000  | -3.164345000 |
| C | 2.238209000  | -0.559303000 | 4.490303000  |
| H | 2.584618000  | -0.789890000 | 5.493806000  |
| C | 3.001426000  | 0.269876000  | 3.662906000  |
| H | 3.939915000  | 0.683225000  | 4.021516000  |
| C | 1.670396000  | 4.327936000  | 0.139756000  |
| H | 1.704166000  | 5.151999000  | 0.846779000  |
| C | 1.935309000  | 4.552204000  | -1.212374000 |
| H | 2.174133000  | 5.552099000  | -1.562842000 |
| H | 3.623002000  | -0.583008000 | -0.225534000 |
| H | -1.195634000 | -1.651111000 | -2.403724000 |
| B | -0.959004000 | -3.987275000 | 1.548203000  |

|   |              |              |              |
|---|--------------|--------------|--------------|
| H | 0.144949000  | -3.583060000 | 1.841478000  |
| H | -1.120443000 | -5.162150000 | 1.803689000  |
| H | -1.849580000 | -3.290463000 | 1.996984000  |
| N | -1.064286000 | -3.858625000 | -0.083864000 |
| H | -0.308792000 | -4.374827000 | -0.531316000 |
| H | -1.001279000 | -2.883355000 | -0.431641000 |
| H | -1.944095000 | -4.244516000 | -0.421029000 |
| C | 5.018015000  | -2.255035000 | -1.898420000 |
| H | 5.261421000  | -3.215228000 | -1.425724000 |
| H | 5.394576000  | -2.297549000 | -2.926442000 |
| H | 5.580961000  | -1.480263000 | -1.368875000 |

**BCDB**

|   |              |              |              |
|---|--------------|--------------|--------------|
| N | 0.612463000  | -0.000002000 | -0.000022000 |
| H | 1.165998000  | -0.844151000 | 0.000191000  |
| H | 1.165890000  | 0.844224000  | -0.000044000 |
| B | -0.779518000 | -0.000004000 | -0.000022000 |
| H | -1.360745000 | -1.045687000 | -0.000035000 |
| H | -1.360798000 | 1.045648000  | 0.000155000  |

**Int2**

|    |              |              |              |
|----|--------------|--------------|--------------|
| Co | 1.486378000  | -0.452298000 | -0.640327000 |
| P  | -0.552854000 | 0.118642000  | -0.083098000 |
| N  | -0.424160000 | -2.633201000 | -1.666831000 |
| C  | 3.334529000  | 0.670996000  | -0.664114000 |
| C  | 3.519819000  | -0.722667000 | -1.027782000 |
| C  | -1.698982000 | -2.094814000 | -1.498245000 |
| C  | 2.839613000  | 0.711266000  | 0.655430000  |
| C  | -3.250934000 | -0.413665000 | -0.679982000 |
| C  | -1.927716000 | -0.859271000 | -0.841556000 |
| C  | 2.704838000  | -0.653870000 | 1.130787000  |
| C  | -0.909789000 | 1.880775000  | -0.515269000 |
| C  | -0.963256000 | -0.003314000 | 1.714509000  |
| C  | -2.821800000 | -2.830099000 | -1.934010000 |
| H  | -2.658970000 | -3.782891000 | -2.433162000 |
| C  | 3.184666000  | -1.524019000 | 0.108332000  |
| C  | -4.358776000 | -1.135014000 | -1.118329000 |
| C  | 3.635803000  | 1.854748000  | -1.536153000 |
| H  | 3.445242000  | 1.630156000  | -2.589535000 |
| H  | 4.686280000  | 2.164346000  | -1.450290000 |
| H  | 3.016744000  | 2.714874000  | -1.264058000 |
| C  | 2.294392000  | -1.072885000 | 2.513324000  |
| H  | 1.590959000  | -0.368512000 | 2.961026000  |
| H  | 3.163761000  | -1.145010000 | 3.180628000  |
| H  | 1.804490000  | -2.050502000 | 2.503750000  |
| C  | -0.120362000 | 2.476373000  | -1.512215000 |

|   |              |              |              |
|---|--------------|--------------|--------------|
| H | 0.661460000  | 1.886799000  | -1.979969000 |
| C | 2.537442000  | 1.959815000  | 1.435532000  |
| H | 1.935573000  | 2.665660000  | 0.852655000  |
| H | 3.460611000  | 2.477172000  | 1.725951000  |
| H | 1.989766000  | 1.733087000  | 2.352043000  |
| C | 4.123890000  | -1.207933000 | -2.314073000 |
| H | 3.802375000  | -2.226714000 | -2.547513000 |
| H | 5.221029000  | -1.210559000 | -2.263051000 |
| H | 3.830224000  | -0.571215000 | -3.152464000 |
| C | -4.113973000 | -2.366603000 | -1.744562000 |
| H | -4.950262000 | -2.966493000 | -2.096733000 |
| C | -1.398060000 | -1.237168000 | 2.223984000  |
| H | -1.604704000 | -2.057103000 | 1.542506000  |
| C | -0.333139000 | 3.803658000  | -1.887486000 |
| H | 0.287299000  | 4.248962000  | -2.660158000 |
| C | -1.908935000 | 2.649788000  | 0.104385000  |
| H | -2.510339000 | 2.224183000  | 0.901059000  |
| C | 3.275949000  | -3.020903000 | 0.196936000  |
| H | 2.485767000  | -3.431787000 | 0.831904000  |
| H | 4.238129000  | -3.340491000 | 0.618868000  |
| H | 3.180341000  | -3.486284000 | -0.788286000 |
| C | -0.705474000 | 1.043498000  | 2.612955000  |
| H | -0.363904000 | 2.003569000  | 2.242517000  |
| C | -1.570713000 | -1.417996000 | 3.595961000  |
| H | -1.907950000 | -2.379536000 | 3.972675000  |
| C | -1.332528000 | 4.557081000  | -1.269211000 |
| H | -1.494776000 | 5.591786000  | -1.557756000 |
| C | -2.118439000 | 3.977250000  | -0.271046000 |
| H | -2.893089000 | 4.558974000  | 0.220682000  |
| C | -0.885881000 | 0.863081000  | 3.985795000  |
| H | -0.687446000 | 1.686761000  | 4.665945000  |
| C | -1.315602000 | -0.368768000 | 4.482101000  |
| H | -1.452423000 | -0.509856000 | 5.550318000  |
| H | -3.424666000 | 0.535669000  | -0.184764000 |
| H | -0.398394000 | -3.432970000 | -2.286195000 |
| H | 1.096663000  | -0.335496000 | -2.099413000 |
| H | 0.292550000  | -1.947756000 | -1.917543000 |
| C | -5.765535000 | -0.615521000 | -0.939814000 |
| H | -6.215183000 | -0.335882000 | -1.900659000 |
| H | -6.418024000 | -1.371006000 | -0.487317000 |
| H | -5.785705000 | 0.269969000  | -0.297631000 |

### Int3

|    |              |              |              |
|----|--------------|--------------|--------------|
| Co | -0.837689000 | -1.343492000 | -0.215739000 |
| P  | -0.627562000 | 0.760816000  | 0.249265000  |
| N  | 0.014796000  | -0.628069000 | -2.296766000 |

|   |              |              |              |
|---|--------------|--------------|--------------|
| C | -1.417432000 | -3.108383000 | 0.909022000  |
| C | -1.293020000 | -3.410951000 | -0.508573000 |
| C | 0.329615000  | 0.772202000  | -2.360958000 |
| C | -2.471739000 | -2.185954000 | 1.074153000  |
| C | 0.601425000  | 2.898130000  | -1.237638000 |
| C | 0.195645000  | 1.557589000  | -1.203183000 |
| C | -2.973838000 | -1.855773000 | -0.240447000 |
| C | 0.346889000  | 1.249482000  | 1.742210000  |
| C | -2.140775000 | 1.811353000  | 0.419456000  |
| C | 0.822535000  | 1.360466000  | -3.533723000 |
| H | 0.932648000  | 0.748739000  | -4.425572000 |
| C | -2.296929000 | -2.674965000 | -1.195436000 |
| C | 1.118514000  | 3.486750000  | -2.393802000 |
| C | -0.584927000 | -3.722535000 | 1.997388000  |
| H | 0.449806000  | -3.857523000 | 1.669596000  |
| H | -0.971788000 | -4.704575000 | 2.302735000  |
| H | -0.565916000 | -3.086085000 | 2.887187000  |
| C | -4.140059000 | -0.953714000 | -0.529195000 |
| H | -4.200847000 | -0.128562000 | 0.184263000  |
| H | -5.091866000 | -1.500953000 | -0.484810000 |
| H | -4.064888000 | -0.508507000 | -1.525846000 |
| C | 1.003899000  | 0.236526000  | 2.453493000  |
| H | 0.941837000  | -0.780053000 | 2.077341000  |
| C | -2.968339000 | -1.620617000 | 2.373939000  |
| H | -2.153278000 | -1.490802000 | 3.094012000  |
| H | -3.718328000 | -2.271934000 | 2.843666000  |
| H | -3.435493000 | -0.643153000 | 2.229500000  |
| C | -0.391578000 | -4.458593000 | -1.094984000 |
| H | -0.104113000 | -4.214540000 | -2.123345000 |
| H | -0.872290000 | -5.446845000 | -1.117401000 |
| H | 0.528715000  | -4.553867000 | -0.513348000 |
| C | 1.208290000  | 2.697526000  | -3.550645000 |
| H | 1.599322000  | 3.132125000  | -4.467584000 |
| C | -2.783775000 | 2.321969000  | -0.719028000 |
| H | -2.319834000 | 2.211569000  | -1.694411000 |
| C | 1.727288000  | 0.536918000  | 3.609362000  |
| H | 2.229823000  | -0.260110000 | 4.150487000  |
| C | 0.416031000  | 2.568651000  | 2.222120000  |
| H | -0.135525000 | 3.358868000  | 1.722270000  |
| C | -2.570366000 | -2.706326000 | -2.671052000 |
| H | -2.846025000 | -1.715570000 | -3.049100000 |
| H | -3.396131000 | -3.385906000 | -2.921347000 |
| H | -1.695467000 | -3.048931000 | -3.234253000 |
| C | -2.766241000 | 1.963914000  | 1.667767000  |
| H | -2.286400000 | 1.577987000  | 2.561719000  |
| C | -4.014786000 | 2.969686000  | -0.612212000 |

|   |              |              |              |
|---|--------------|--------------|--------------|
| H | -4.495742000 | 3.360264000  | -1.504855000 |
| C | 1.809756000  | 1.852540000  | 4.065091000  |
| H | 2.374127000  | 2.086246000  | 4.963790000  |
| C | 1.150928000  | 2.869697000  | 3.368167000  |
| H | 1.197537000  | 3.894696000  | 3.725828000  |
| C | -3.998563000 | 2.610158000  | 1.773775000  |
| H | -4.465858000 | 2.719215000  | 2.748615000  |
| C | -4.628382000 | 3.114412000  | 0.633753000  |
| H | -5.588233000 | 3.616138000  | 0.716101000  |
| H | 0.514539000  | 3.503277000  | -0.341396000 |
| H | -0.448645000 | -0.945248000 | -3.142982000 |
| H | 0.600068000  | -1.476118000 | 0.157647000  |
| H | 0.892479000  | -1.148954000 | -2.196844000 |
| C | 1.536796000  | 4.938232000  | -2.412902000 |
| H | 2.465234000  | 5.079077000  | -2.976282000 |
| H | 0.772136000  | 5.564994000  | -2.888143000 |
| H | 1.693633000  | 5.322629000  | -1.400893000 |
| C | 3.893754000  | 1.560188000  | -0.179319000 |
| C | 3.428956000  | 0.625348000  | -1.077567000 |
| C | 3.356042000  | -0.744092000 | -0.714759000 |
| C | 3.794473000  | -1.138828000 | 0.590339000  |
| C | 4.281756000  | -0.152835000 | 1.486038000  |
| C | 4.322930000  | 1.171259000  | 1.112486000  |
| H | 3.921742000  | 2.608092000  | -0.462056000 |
| H | 3.093802000  | 0.913334000  | -2.066862000 |
| C | 3.703645000  | -2.512966000 | 0.926349000  |
| H | 4.601140000  | -0.458133000 | 2.478837000  |
| H | 4.670771000  | 1.923603000  | 1.813538000  |
| C | 3.212741000  | -3.403078000 | 0.001611000  |
| C | 2.801491000  | -2.910801000 | -1.261322000 |
| H | 4.020597000  | -2.843410000 | 1.912600000  |
| H | 3.125063000  | -4.461888000 | 0.222286000  |
| H | 2.388913000  | -3.601243000 | -1.994098000 |
| N | 2.862040000  | -1.643562000 | -1.620841000 |

### TS1

|    |              |              |              |
|----|--------------|--------------|--------------|
| Co | -0.215418000 | 1.522705000  | 0.095827000  |
| P  | -0.961463000 | -0.525345000 | -0.426828000 |
| N  | 0.336817000  | 0.549886000  | 1.855024000  |
| C  | 0.168119000  | 3.615671000  | 0.253424000  |
| C  | -0.859097000 | 3.323188000  | 1.195897000  |
| C  | -0.523572000 | -0.470245000 | 2.256689000  |
| C  | -0.349281000 | 3.305719000  | -1.063275000 |
| C  | -1.959389000 | -2.337276000 | 1.595727000  |
| C  | -1.183542000 | -1.222393000 | 1.250220000  |
| C  | -1.681022000 | 2.834447000  | -0.915501000 |



|   |              |              |              |
|---|--------------|--------------|--------------|
| C | 0.197674000  | -1.671343000 | -1.302992000 |
| C | -2.550584000 | -0.872823000 | -1.286446000 |
| C | -0.724719000 | -0.852574000 | 3.600806000  |
| H | -0.238785000 | -0.283329000 | 4.390325000  |
| C | -1.979028000 | 2.783267000  | 0.491182000  |
| C | -2.136592000 | -2.727731000 | 2.924668000  |
| C | 1.488281000  | 4.270615000  | 0.538535000  |
| H | 1.864272000  | 4.008490000  | 1.532778000  |
| H | 1.413775000  | 5.365875000  | 0.498439000  |
| H | 2.244584000  | 3.966583000  | -0.190338000 |
| C | -2.607074000 | 2.473293000  | -2.039164000 |
| H | -2.074698000 | 1.967936000  | -2.850222000 |
| H | -3.078327000 | 3.369961000  | -2.463205000 |
| H | -3.403853000 | 1.802525000  | -1.713006000 |
| C | 1.326433000  | -1.158345000 | -1.954434000 |
| H | 1.511327000  | -0.089670000 | -1.911644000 |
| C | 0.364768000  | 3.548562000  | -2.361068000 |
| H | 1.442174000  | 3.401126000  | -2.251122000 |
| H | 0.200487000  | 4.571634000  | -2.726025000 |
| H | 0.017217000  | 2.861345000  | -3.137456000 |
| C | -0.787786000 | 3.499168000  | 2.683078000  |
| H | -1.264998000 | 2.663346000  | 3.205853000  |
| H | -1.301190000 | 4.415570000  | 3.002387000  |
| H | 0.246523000  | 3.571915000  | 3.033922000  |
| C | -1.510568000 | -1.953196000 | 3.918360000  |
| H | -1.643147000 | -2.224946000 | 4.963764000  |
| C | -3.774802000 | -0.750605000 | -0.606940000 |
| H | -3.779049000 | -0.576391000 | 0.463720000  |
| C | 2.217598000  | -2.012362000 | -2.607535000 |
| H | 3.097819000  | -1.599728000 | -3.091943000 |
| C | -0.026772000 | -3.057727000 | -1.323224000 |
| H | -0.897121000 | -3.473146000 | -0.825070000 |
| C | -3.285191000 | 2.393957000  | 1.123731000  |
| H | -3.908091000 | 1.823417000  | 0.432023000  |
| H | -3.861753000 | 3.275446000  | 1.434961000  |
| H | -3.128786000 | 1.774838000  | 2.013754000  |
| C | -2.570948000 | -1.102302000 | -2.672044000 |
| H | -1.636045000 | -1.203876000 | -3.215196000 |
| C | -4.983742000 | -0.856932000 | -1.294737000 |
| H | -5.920347000 | -0.765169000 | -0.751540000 |
| C | 1.988335000  | -3.388275000 | -2.619589000 |
| H | 2.684890000  | -4.053593000 | -3.122329000 |
| C | 0.862678000  | -3.910190000 | -1.975633000 |
| H | 0.678837000  | -4.981197000 | -1.980684000 |
| C | -3.780883000 | -1.205306000 | -3.358366000 |
| H | -3.776949000 | -1.384840000 | -4.429949000 |

|   |              |              |              |
|---|--------------|--------------|--------------|
| C | -4.991981000 | -1.080389000 | -2.673803000 |
| H | -5.933646000 | -1.159748000 | -3.209273000 |
| H | -2.474367000 | -2.888735000 | 0.812846000  |
| H | 0.538330000  | 1.177030000  | 2.630885000  |
| H | 1.070053000  | 1.207565000  | -0.528329000 |
| H | 1.542524000  | -0.086590000 | 1.471613000  |
| C | -2.989310000 | -3.918847000 | 3.294091000  |
| H | -2.419065000 | -4.661182000 | 3.865749000  |
| H | -3.844688000 | -3.626139000 | 3.915321000  |
| H | -3.383671000 | -4.418410000 | 2.404102000  |
| C | 4.712783000  | 1.873288000  | -0.144087000 |
| C | 3.622612000  | 1.271314000  | 0.465157000  |
| C | 3.555934000  | -0.134089000 | 0.549655000  |
| C | 4.609431000  | -0.941610000 | 0.015116000  |
| C | 5.706053000  | -0.289321000 | -0.602893000 |
| C | 5.755385000  | 1.091980000  | -0.681225000 |
| H | 4.758370000  | 2.956327000  | -0.210679000 |
| H | 2.796990000  | 1.854236000  | 0.852240000  |
| C | 4.491814000  | -2.352388000 | 0.123643000  |
| H | 6.509012000  | -0.895533000 | -1.013686000 |
| H | 6.601859000  | 1.577222000  | -1.158248000 |
| C | 3.370407000  | -2.909249000 | 0.728706000  |
| C | 2.374382000  | -2.071415000 | 1.223266000  |
| H | 5.277618000  | -2.983642000 | -0.280272000 |
| H | 3.247805000  | -3.983378000 | 0.806234000  |
| H | 1.468865000  | -2.451264000 | 1.681741000  |
| N | 2.470700000  | -0.732738000 | 1.140501000  |

#### Int4

|    |              |              |              |
|----|--------------|--------------|--------------|
| Co | 0.533010000  | -1.444263000 | 0.396490000  |
| P  | 0.960914000  | 0.571197000  | -0.346204000 |
| N  | 0.210178000  | -0.595538000 | 2.103291000  |
| C  | 0.145655000  | -3.306107000 | -0.502144000 |
| C  | 0.360872000  | -3.458569000 | 0.904356000  |
| C  | 0.449568000  | 0.727520000  | 2.300073000  |
| C  | 1.330610000  | -2.738098000 | -1.062948000 |
| C  | 0.938673000  | 2.920372000  | 1.291040000  |
| C  | 0.787102000  | 1.532628000  | 1.174939000  |
| C  | 2.326539000  | -2.633646000 | -0.014569000 |
| C  | -0.138769000 | 1.305226000  | -1.624009000 |
| C  | 2.653699000  | 0.943808000  | -0.964807000 |
| C  | 0.310512000  | 1.399465000  | 3.546742000  |
| H  | 0.049490000  | 0.822550000  | 4.431204000  |
| C  | 1.723534000  | -3.062581000 | 1.188058000  |
| C  | 0.781740000  | 3.572327000  | 2.511972000  |
| C  | -1.084385000 | -3.689721000 | -1.270244000 |

|   |              |              |              |
|---|--------------|--------------|--------------|
| H | -1.989016000 | -3.572973000 | -0.672895000 |
| H | -1.020748000 | -4.734145000 | -1.601224000 |
| H | -1.204710000 | -3.065537000 | -2.158754000 |
| C | 3.754391000  | -2.212344000 | -0.196221000 |
| H | 3.874105000  | -1.535863000 | -1.043749000 |
| H | 4.394395000  | -3.086050000 | -0.374189000 |
| H | 4.137552000  | -1.694078000 | 0.686200000  |
| C | -1.344316000 | 0.671569000  | -1.953154000 |
| H | -1.594632000 | -0.275741000 | -1.488457000 |
| C | 1.551822000  | -2.459506000 | -2.521885000 |
| H | 0.661764000  | -2.021290000 | -2.982073000 |
| H | 1.789645000  | -3.381405000 | -3.067531000 |
| H | 2.379685000  | -1.764544000 | -2.672037000 |
| C | -0.596849000 | -4.035371000 | 1.904044000  |
| H | -0.611173000 | -3.451349000 | 2.830150000  |
| H | -0.322673000 | -5.063150000 | 2.173376000  |
| H | -1.615563000 | -4.056549000 | 1.511108000  |
| C | 0.471203000  | 2.771695000  | 3.633853000  |
| H | 0.345033000  | 3.252659000  | 4.602121000  |
| C | 3.679358000  | 1.216241000  | -0.046663000 |
| H | 3.440390000  | 1.308894000  | 1.008317000  |
| C | -2.238695000 | 1.267125000  | -2.843403000 |
| H | -3.180123000 | 0.772001000  | -3.059181000 |
| C | 0.165670000  | 2.542352000  | -2.218489000 |
| H | 1.104288000  | 3.039270000  | -1.992868000 |
| C | 2.359634000  | -3.104954000 | 2.544159000  |
| H | 3.242264000  | -2.463226000 | 2.592768000  |
| H | 2.669441000  | -4.125622000 | 2.800669000  |
| H | 1.664408000  | -2.769925000 | 3.319120000  |
| C | 2.972526000  | 0.841199000  | -2.328409000 |
| H | 2.187349000  | 0.651164000  | -3.053429000 |
| C | 4.995164000  | 1.374811000  | -0.482312000 |
| H | 5.778361000  | 1.588806000  | 0.239452000  |
| C | -1.931664000 | 2.497374000  | -3.424162000 |
| H | -2.629347000 | 2.964259000  | -4.113643000 |
| C | -0.726168000 | 3.132405000  | -3.112592000 |
| H | -0.481242000 | 4.089843000  | -3.563967000 |
| C | 4.289979000  | 0.997685000  | -2.761699000 |
| H | 4.521363000  | 0.918530000  | -3.820160000 |
| C | 5.305466000  | 1.260845000  | -1.839198000 |
| H | 6.330493000  | 1.382904000  | -2.177043000 |
| H | 1.179579000  | 3.503443000  | 0.405204000  |
| H | 0.074886000  | -1.131575000 | 2.952362000  |
| H | -0.819338000 | -1.137665000 | 0.020598000  |
| H | -1.772156000 | 0.112224000  | 1.656961000  |
| C | 0.949948000  | 5.066855000  | 2.649552000  |

|   |              |              |              |
|---|--------------|--------------|--------------|
| H | 0.075561000  | 5.530540000  | 3.121975000  |
| H | 1.820132000  | 5.324473000  | 3.267007000  |
| H | 1.088184000  | 5.542279000  | 1.673625000  |
| C | -4.421900000 | -2.330578000 | -0.053357000 |
| C | -3.487807000 | -1.564538000 | 0.657046000  |
| C | -3.507750000 | -0.169811000 | 0.569386000  |
| C | -4.489702000 | 0.498063000  | -0.230066000 |
| C | -5.407456000 | -0.307768000 | -0.940449000 |
| C | -5.374791000 | -1.700188000 | -0.855963000 |
| H | -4.403007000 | -3.413702000 | 0.028396000  |
| H | -2.734353000 | -2.038202000 | 1.277680000  |
| C | -4.479835000 | 1.925319000  | -0.278166000 |
| H | -6.155222000 | 0.184337000  | -1.557385000 |
| H | -6.098036000 | -2.291625000 | -1.410372000 |
| C | -3.506455000 | 2.640076000  | 0.445975000  |
| C | -2.561115000 | 1.979627000  | 1.190529000  |
| H | -5.217992000 | 2.442237000  | -0.882203000 |
| H | -3.482363000 | 3.724340000  | 0.417055000  |
| H | -1.779994000 | 2.471656000  | 1.752182000  |
| N | -2.572709000 | 0.596977000  | 1.252507000  |

#### TS2<sub>ci</sub>

|    |              |              |              |
|----|--------------|--------------|--------------|
| Co | -1.446163000 | -0.886026000 | -0.505657000 |
| P  | -0.271661000 | 0.741849000  | 0.377265000  |
| N  | -0.577458000 | -0.378917000 | -2.175542000 |
| C  | -2.599933000 | -2.565999000 | 0.111570000  |
| C  | -2.851327000 | -2.250757000 | -1.257154000 |
| C  | 0.137149000  | 0.778643000  | -2.283278000 |
| C  | -2.962526000 | -1.421632000 | 0.887995000  |
| C  | 1.245955000  | 2.655706000  | -1.144120000 |
| C  | 0.474467000  | 1.486797000  | -1.093964000 |
| C  | -3.574029000 | -0.448098000 | 0.004644000  |
| C  | 1.017700000  | 0.276550000  | 1.601699000  |
| C  | -1.135227000 | 2.126325000  | 1.233146000  |
| C  | 0.635742000  | 1.306323000  | -3.505920000 |
| H  | 0.402087000  | 0.792671000  | -4.436158000 |
| C  | -3.489796000 | -0.947923000 | -1.307159000 |
| C  | 1.744827000  | 3.156690000  | -2.345048000 |
| C  | -2.040958000 | -3.849553000 | 0.650450000  |
| H  | -1.500124000 | -4.405274000 | -0.119445000 |
| H  | -2.839700000 | -4.500627000 | 1.027352000  |
| H  | -1.341916000 | -3.666202000 | 1.471031000  |
| C  | -4.220468000 | 0.830067000  | 0.448707000  |
| H  | -3.747747000 | 1.230240000  | 1.347606000  |
| H  | -5.281984000 | 0.667876000  | 0.677710000  |
| H  | -4.160236000 | 1.605348000  | -0.318756000 |

|   |              |              |              |
|---|--------------|--------------|--------------|
| C | 0.776623000  | -0.847880000 | 2.401977000  |
| H | -0.096719000 | -1.457810000 | 2.201067000  |
| C | -2.947417000 | -1.324652000 | 2.387002000  |
| H | -2.232395000 | -2.023442000 | 2.828691000  |
| H | -3.934560000 | -1.559452000 | 2.806300000  |
| H | -2.681692000 | -0.318345000 | 2.721675000  |
| C | -2.633215000 | -3.141225000 | -2.444731000 |
| H | -2.327316000 | -2.564841000 | -3.323837000 |
| H | -3.548364000 | -3.681862000 | -2.718436000 |
| H | -1.856529000 | -3.886636000 | -2.253482000 |
| C | 1.416579000  | 2.451266000  | -3.521480000 |
| H | 1.782695000  | 2.822907000  | -4.476898000 |
| C | -1.727603000 | 3.149308000  | 0.476326000  |
| H | -1.585267000 | 3.169113000  | -0.599744000 |
| C | 1.667282000  | -1.198745000 | 3.417618000  |
| H | 1.470817000  | -2.074921000 | 4.029023000  |
| C | 2.180336000  | 1.031092000  | 1.814171000  |
| H | 2.406634000  | 1.878425000  | 1.178571000  |
| C | -3.949273000 | -0.274514000 | -2.565153000 |
| H | -4.253274000 | 0.757825000  | -2.377114000 |
| H | -4.802239000 | -0.800479000 | -3.011427000 |
| H | -3.150089000 | -0.249107000 | -3.313244000 |
| C | -1.318021000 | 2.117966000  | 2.624766000  |
| H | -0.851646000 | 1.343967000  | 3.226772000  |
| C | -2.489767000 | 4.138257000  | 1.097842000  |
| H | -2.938803000 | 4.926330000  | 0.499771000  |
| C | 2.816335000  | -0.437029000 | 3.629944000  |
| H | 3.517626000  | -0.713978000 | 4.412089000  |
| C | 3.075523000  | 0.670758000  | 2.818943000  |
| H | 3.985108000  | 1.246867000  | 2.958429000  |
| C | -2.087352000 | 3.105036000  | 3.243377000  |
| H | -2.219734000 | 3.086502000  | 4.321557000  |
| C | -2.677316000 | 4.116205000  | 2.481903000  |
| H | -3.273933000 | 4.884992000  | 2.964442000  |
| H | 1.439010000  | 3.204819000  | -0.225700000 |
| H | -0.925626000 | -0.722926000 | -3.064307000 |
| H | -0.258587000 | -1.792061000 | -0.142688000 |
| H | 1.216554000  | -1.300174000 | -2.025240000 |
| C | 2.596723000  | 4.402546000  | -2.398576000 |
| H | 3.616674000  | 4.181824000  | -2.738779000 |
| H | 2.185025000  | 5.148677000  | -3.089137000 |
| H | 2.675638000  | 4.872506000  | -1.413363000 |
| C | 4.685754000  | 0.370327000  | -0.917269000 |
| C | 3.512722000  | -0.160084000 | -1.451909000 |
| C | 2.950786000  | -1.315196000 | -0.891683000 |
| C | 3.561521000  | -1.937940000 | 0.234392000  |

|   |             |              |              |
|---|-------------|--------------|--------------|
| C | 4.753955000 | -1.388171000 | 0.735038000  |
| C | 5.316974000 | -0.247274000 | 0.168364000  |
| H | 5.106483000 | 1.271827000  | -1.353551000 |
| H | 3.017100000 | 0.323438000  | -2.288006000 |
| C | 2.905271000 | -3.078172000 | 0.824279000  |
| H | 5.220339000 | -1.859739000 | 1.596100000  |
| H | 6.234524000 | 0.166828000  | 0.575867000  |
| C | 1.691420000 | -3.507430000 | 0.337924000  |
| C | 1.073292000 | -2.845469000 | -0.743576000 |
| H | 3.367550000 | -3.563300000 | 1.678226000  |
| H | 1.173273000 | -4.346502000 | 0.791194000  |
| H | 0.294013000 | -3.323892000 | -1.320492000 |
| N | 1.809231000 | -1.888103000 | -1.435347000 |

**TS1'**

|    |              |              |              |
|----|--------------|--------------|--------------|
| Co | -1.353907000 | -0.991765000 | -0.429101000 |
| P  | -0.267328000 | 0.743044000  | 0.381566000  |
| N  | -0.179436000 | -0.446121000 | -2.280833000 |
| C  | -2.714746000 | -2.519676000 | 0.369625000  |
| C  | -2.688722000 | -2.524305000 | -1.084296000 |
| C  | 0.359116000  | 0.871885000  | -2.293313000 |
| C  | -3.195440000 | -1.266707000 | 0.788588000  |
| C  | 1.091476000  | 2.826537000  | -1.047506000 |
| C  | 0.503185000  | 1.553478000  | -1.069736000 |
| C  | -3.485664000 | -0.479733000 | -0.404847000 |
| C  | 1.044865000  | 0.366193000  | 1.609496000  |
| C  | -1.161248000 | 2.143166000  | 1.194615000  |
| C  | 0.784852000  | 1.502746000  | -3.471249000 |
| H  | 0.673822000  | 0.985203000  | -4.420890000 |
| C  | -3.238873000 | -1.289559000 | -1.541964000 |
| C  | 1.543162000  | 3.447481000  | -2.213802000 |
| C  | -2.286821000 | -3.660786000 | 1.245830000  |
| H  | -1.441804000 | -4.201311000 | 0.810295000  |
| H  | -3.097558000 | -4.386491000 | 1.391940000  |
| H  | -1.974638000 | -3.311523000 | 2.234236000  |
| C  | -4.156291000 | 0.861719000  | -0.413871000 |
| H  | -3.913505000 | 1.444638000  | 0.475934000  |
| H  | -5.248773000 | 0.750677000  | -0.448428000 |
| H  | -3.860733000 | 1.453946000  | -1.285252000 |
| C  | 0.749363000  | -0.624152000 | 2.558064000  |
| H  | -0.172686000 | -1.190707000 | 2.459000000  |
| C  | -3.424154000 | -0.804646000 | 2.197681000  |
| H  | -2.823683000 | -1.377743000 | 2.910468000  |
| H  | -4.476375000 | -0.917419000 | 2.491500000  |
| H  | -3.163734000 | 0.250093000  | 2.321386000  |
| C  | -2.326643000 | -3.694827000 | -1.952920000 |

|   |              |              |              |
|---|--------------|--------------|--------------|
| H | -1.758913000 | -3.384473000 | -2.836603000 |
| H | -3.221140000 | -4.223400000 | -2.306896000 |
| H | -1.716519000 | -4.423767000 | -1.413523000 |
| C | 1.364470000  | 2.766907000  | -3.428465000 |
| H | 1.690182000  | 3.234824000  | -4.354539000 |
| C | -1.810649000 | 3.110448000  | 0.410187000  |
| H | -1.725283000 | 3.073603000  | -0.670960000 |
| C | 1.640840000  | -0.894949000 | 3.596407000  |
| H | 1.403280000  | -1.664003000 | 4.325908000  |
| C | 2.263893000  | 1.052766000  | 1.689245000  |
| H | 2.530980000  | 1.783191000  | 0.934496000  |
| C | -3.452360000 | -0.885723000 | -2.971476000 |
| H | -3.168532000 | 0.158813000  | -3.139257000 |
| H | -4.503498000 | -0.989867000 | -3.270436000 |
| H | -2.864185000 | -1.506679000 | -3.654416000 |
| C | -1.288866000 | 2.212290000  | 2.590513000  |
| H | -0.788025000 | 1.481969000  | 3.217580000  |
| C | -2.564396000 | 4.121080000  | 1.006273000  |
| H | -3.056619000 | 4.862372000  | 0.383044000  |
| C | 2.846095000  | -0.196095000 | 3.678975000  |
| H | 3.547782000  | -0.413775000 | 4.479248000  |
| C | 3.160052000  | 0.767416000  | 2.717429000  |
| H | 4.112607000  | 1.286431000  | 2.757337000  |
| C | -2.050076000 | 3.220367000  | 3.185044000  |
| H | -2.136153000 | 3.259173000  | 4.267276000  |
| C | -2.689844000 | 4.177796000  | 2.396105000  |
| H | -3.278729000 | 4.963701000  | 2.860096000  |
| H | 1.161326000  | 3.362408000  | -0.104681000 |
| H | -0.620227000 | -0.671907000 | -3.167961000 |
| H | -0.035092000 | -1.982840000 | -0.113864000 |
| H | 0.637457000  | -1.133304000 | -2.129617000 |
| C | 2.205477000  | 4.804215000  | -2.173642000 |
| H | 3.296194000  | 4.713791000  | -2.249008000 |
| H | 1.875467000  | 5.436729000  | -3.004390000 |
| H | 1.983978000  | 5.330183000  | -1.240272000 |
| C | 4.776309000  | -0.053640000 | -1.216653000 |
| C | 3.591756000  | -0.594600000 | -1.682454000 |
| C | 2.889752000  | -1.574754000 | -0.928819000 |
| C | 3.457528000  | -1.988078000 | 0.322594000  |
| C | 4.679247000  | -1.441704000 | 0.753679000  |
| C | 5.337559000  | -0.477976000 | 0.005501000  |
| H | 5.283810000  | 0.706839000  | -1.805215000 |
| H | 3.161628000  | -0.268691000 | -2.624851000 |
| C | 2.732692000  | -2.974272000 | 1.075632000  |
| H | 5.090044000  | -1.773969000 | 1.704678000  |
| H | 6.274234000  | -0.053602000 | 0.354559000  |

|   |             |              |              |
|---|-------------|--------------|--------------|
| C | 1.517588000 | -3.398407000 | 0.656057000  |
| C | 0.927915000 | -2.823050000 | -0.562200000 |
| H | 3.178994000 | -3.370374000 | 1.985129000  |
| H | 0.944389000 | -4.128247000 | 1.220395000  |
| H | 0.240019000 | -3.487695000 | -1.086087000 |
| N | 1.741040000 | -2.107867000 | -1.424463000 |

### 1,2-DHQ

|   |              |              |              |
|---|--------------|--------------|--------------|
| C | 2.469637000  | -0.723996000 | 0.041383000  |
| C | 1.248391000  | -1.394832000 | -0.031616000 |
| C | 0.045890000  | -0.675163000 | -0.071155000 |
| C | 0.084426000  | 0.742780000  | -0.038362000 |
| C | 1.321254000  | 1.391118000  | 0.031838000  |
| C | 2.516128000  | 0.671613000  | 0.076897000  |
| H | 3.390129000  | -1.300355000 | 0.074250000  |
| H | 1.222662000  | -2.481870000 | -0.061533000 |
| C | -1.186379000 | 1.458458000  | -0.108151000 |
| H | 1.338125000  | 2.478428000  | 0.052439000  |
| H | 3.467709000  | 1.190298000  | 0.134907000  |
| C | -2.358640000 | 0.815911000  | -0.008583000 |
| C | -2.417453000 | -0.672537000 | 0.230359000  |
| H | -1.156915000 | 2.537450000  | -0.241685000 |
| H | -3.301640000 | 1.353560000  | -0.044304000 |
| H | -3.254027000 | -1.115208000 | -0.325331000 |
| N | -1.180816000 | -1.309269000 | -0.218274000 |
| H | -1.156562000 | -2.312380000 | -0.099998000 |
| H | -2.623297000 | -0.865151000 | 1.303511000  |

### TS1c

|    |              |              |              |
|----|--------------|--------------|--------------|
| Co | 0.901847000  | 1.276487000  | 0.017415000  |
| P  | 0.707092000  | -0.867086000 | -0.138101000 |
| N  | -0.645972000 | 0.247272000  | -2.649417000 |
| C  | 1.939320000  | 2.642848000  | 1.403073000  |
| C  | 1.142298000  | 3.349926000  | 0.428573000  |
| C  | -1.391452000 | -0.726548000 | -1.997751000 |
| C  | 2.968004000  | 1.949430000  | 0.717976000  |
| C  | -1.774221000 | -2.272448000 | -0.161694000 |
| C  | -0.933745000 | -1.360032000 | -0.809964000 |
| C  | 2.813622000  | 2.200135000  | -0.693302000 |
| C  | 0.905360000  | -1.778937000 | 1.453984000  |
| C  | 1.902194000  | -1.800286000 | -1.209682000 |
| C  | -2.658080000 | -1.074956000 | -2.493873000 |
| H  | -3.019817000 | -0.593678000 | -3.398853000 |
| C  | 1.705326000  | 3.086463000  | -0.864784000 |
| C  | -3.044569000 | -2.601858000 | -0.642445000 |
| C  | 1.740904000  | 2.720688000  | 2.890028000  |



|   |              |              |              |
|---|--------------|--------------|--------------|
| H | 0.676882000  | 2.700984000  | 3.150230000  |
| H | 2.156777000  | 3.648383000  | 3.307376000  |
| H | 2.231035000  | 1.888532000  | 3.405386000  |
| C | 3.729525000  | 1.704517000  | -1.776993000 |
| H | 4.031430000  | 0.665958000  | -1.612819000 |
| H | 4.645604000  | 2.307358000  | -1.845741000 |
| H | 3.244246000  | 1.744451000  | -2.757104000 |
| C | 1.027918000  | -1.029372000 | 2.630628000  |
| H | 0.995865000  | 0.053663000  | 2.556260000  |
| C | 4.052772000  | 1.133919000  | 1.365988000  |
| H | 3.649279000  | 0.409078000  | 2.083019000  |
| H | 4.763591000  | 1.767528000  | 1.912643000  |
| H | 4.629847000  | 0.578606000  | 0.621906000  |
| C | 0.046718000  | 4.319307000  | 0.772527000  |
| H | -0.480636000 | 4.666124000  | -0.120787000 |
| H | 0.444562000  | 5.209593000  | 1.277592000  |
| H | -0.695903000 | 3.863808000  | 1.437013000  |
| C | -3.464016000 | -1.990834000 | -1.828256000 |
| H | -4.445625000 | -2.222496000 | -2.234564000 |
| C | 1.536000000  | -2.439315000 | -2.401770000 |
| H | 0.494248000  | -2.468328000 | -2.704470000 |
| C | 1.210600000  | -1.664261000 | 3.860849000  |
| H | 1.309504000  | -1.071303000 | 4.766010000  |
| C | 0.991334000  | -3.178376000 | 1.522019000  |
| H | 0.927191000  | -3.767613000 | 0.611722000  |
| C | 1.226784000  | 3.668134000  | -2.166574000 |
| H | 1.437646000  | 2.998662000  | -3.006527000 |
| H | 1.709114000  | 4.629628000  | -2.388046000 |
| H | 0.146022000  | 3.841139000  | -2.155421000 |
| C | 3.253674000  | -1.806982000 | -0.825602000 |
| H | 3.547404000  | -1.324765000 | 0.101184000  |
| C | 2.503434000  | -3.058666000 | -3.198623000 |
| H | 2.204110000  | -3.551411000 | -4.119763000 |
| C | 1.274735000  | -3.057268000 | 3.922864000  |
| H | 1.418110000  | -3.554380000 | 4.878196000  |
| C | 1.168091000  | -3.813226000 | 2.751221000  |
| H | 1.230061000  | -4.896970000 | 2.795520000  |
| C | 4.215509000  | -2.433192000 | -1.615458000 |
| H | 5.255391000  | -2.433410000 | -1.300438000 |
| C | 3.843384000  | -3.056318000 | -2.810630000 |
| H | 4.592838000  | -3.540204000 | -3.430386000 |
| H | -1.435848000 | -2.734074000 | 0.759894000  |
| H | 0.345236000  | 0.313412000  | -2.465301000 |
| H | -0.591970000 | 1.301236000  | 0.886786000  |
| H | -0.911858000 | 0.470651000  | -3.595716000 |
| C | -3.935804000 | -3.549045000 | 0.124157000  |

|   |              |              |              |
|---|--------------|--------------|--------------|
| H | -4.387704000 | -3.047930000 | 0.989454000  |
| H | -4.750390000 | -3.929190000 | -0.500135000 |
| H | -3.376276000 | -4.409538000 | 0.506750000  |
| C | -4.748821000 | 1.661050000  | -1.569332000 |
| C | -4.973239000 | 0.834697000  | -0.487251000 |
| C | -3.174865000 | -0.217129000 | 2.614278000  |
| C | -4.176334000 | -0.155485000 | 1.661114000  |
| C | -2.560343000 | 2.246556000  | -0.707474000 |
| C | -3.528347000 | 2.360890000  | -1.686565000 |
| H | -5.505069000 | 1.761382000  | -2.342619000 |
| H | -5.898654000 | 0.270708000  | -0.404877000 |
| C | -3.996420000 | 0.685893000  | 0.528635000  |
| H | -1.604148000 | 2.747825000  | -0.795033000 |
| H | -3.345403000 | 2.987084000  | -2.554949000 |
| C | -2.782872000 | 1.427282000  | 0.417310000  |
| N | -1.807147000 | 1.371833000  | 1.407873000  |
| H | -5.092451000 | -0.728569000 | 1.764392000  |
| C | -2.022251000 | 0.561926000  | 2.465483000  |
| H | -1.239436000 | 0.553361000  | 3.216125000  |
| H | -3.281970000 | -0.832671000 | 3.502095000  |

### Int3c

|    |              |              |              |
|----|--------------|--------------|--------------|
| Co | 0.856836000  | 1.274335000  | 0.086848000  |
| P  | 0.842461000  | -0.936206000 | -0.133252000 |
| N  | -0.228728000 | 1.039101000  | -1.946988000 |
| C  | 1.575736000  | 2.451435000  | 1.858784000  |
| C  | 0.994859000  | 3.323663000  | 0.865428000  |
| C  | -1.070839000 | -0.127811000 | -1.927098000 |
| C  | 2.729899000  | 1.847002000  | 1.288354000  |
| C  | -1.550842000 | -2.307691000 | -0.990411000 |
| C  | -0.692631000 | -1.210970000 | -1.106017000 |
| C  | 2.866487000  | 2.310922000  | -0.061709000 |
| C  | 0.808167000  | -2.143382000 | 1.251840000  |
| C  | 2.182881000  | -1.601751000 | -1.212431000 |
| C  | -2.280009000 | -0.172415000 | -2.619820000 |
| H  | -2.579183000 | 0.671124000  | -3.234446000 |
| C  | 1.805663000  | 3.237011000  | -0.312777000 |
| C  | -2.782462000 | -2.347415000 | -1.653355000 |
| C  | 1.118819000  | 2.328104000  | 3.285830000  |
| H  | 0.025753000  | 2.335120000  | 3.368031000  |
| H  | 1.490438000  | 3.152237000  | 3.911587000  |
| H  | 1.476578000  | 1.398340000  | 3.740469000  |
| C  | 3.964201000  | 1.938099000  | -1.020161000 |
| H  | 4.240226000  | 0.882587000  | -0.931373000 |
| H  | 4.875908000  | 2.531096000  | -0.861810000 |
| H  | 3.656398000  | 2.098705000  | -2.058833000 |

|   |              |              |              |
|---|--------------|--------------|--------------|
| C | 0.666340000  | -1.630425000 | 2.548555000  |
| H | 0.602383000  | -0.554574000 | 2.681472000  |
| C | 3.643731000  | 0.877888000  | 1.985971000  |
| H | 3.083895000  | 0.108194000  | 2.530184000  |
| H | 4.294806000  | 1.379497000  | 2.714357000  |
| H | 4.295080000  | 0.365800000  | 1.272524000  |
| C | -0.061880000 | 4.361235000  | 1.141215000  |
| H | -0.591429000 | 4.665853000  | 0.231620000  |
| H | 0.376970000  | 5.273102000  | 1.569955000  |
| H | -0.814262000 | 4.008362000  | 1.854935000  |
| C | -3.127099000 | -1.268837000 | -2.475944000 |
| H | -4.083375000 | -1.271810000 | -2.991792000 |
| C | 2.021968000  | -1.744789000 | -2.598539000 |
| H | 1.045443000  | -1.591144000 | -3.049795000 |
| C | 0.622869000  | -2.487934000 | 3.649537000  |
| H | 0.514828000  | -2.078883000 | 4.650084000  |
| C | 0.934919000  | -3.530072000 | 1.074365000  |
| H | 1.081937000  | -3.935074000 | 0.077064000  |
| C | 1.590632000  | 4.012463000  | -1.582490000 |
| H | 1.894655000  | 3.436567000  | -2.464301000 |
| H | 2.163768000  | 4.949435000  | -1.602491000 |
| H | 0.536268000  | 4.281413000  | -1.713632000 |
| C | 3.448296000  | -1.842767000 | -0.650337000 |
| H | 3.588032000  | -1.741887000 | 0.421739000  |
| C | 3.103383000  | -2.107761000 | -3.404780000 |
| H | 2.961025000  | -2.218626000 | -4.476337000 |
| C | 0.726485000  | -3.867677000 | 3.461677000  |
| H | 0.693102000  | -4.537226000 | 4.316470000  |
| C | 0.887569000  | -4.387375000 | 2.173745000  |
| H | 0.981554000  | -5.459810000 | 2.027815000  |
| C | 4.524042000  | -2.212645000 | -1.455733000 |
| H | 5.494847000  | -2.398192000 | -1.004595000 |
| C | 4.357250000  | -2.340404000 | -2.837754000 |
| H | 5.197080000  | -2.623808000 | -3.465350000 |
| H | -1.282155000 | -3.126332000 | -0.330105000 |
| H | 0.591966000  | 0.926832000  | -2.538710000 |
| H | -1.379564000 | 2.334560000  | 0.374695000  |
| H | -0.741086000 | 1.859158000  | -2.257971000 |
| C | -3.744607000 | -3.484917000 | -1.417090000 |
| H | -4.362444000 | -3.270638000 | -0.536531000 |
| H | -4.416668000 | -3.630993000 | -2.268279000 |
| H | -3.219662000 | -4.426846000 | -1.230407000 |
| C | -4.078733000 | -1.308407000 | 1.785429000  |
| C | -4.767979000 | -0.571779000 | 0.821649000  |
| C | -4.204885000 | 2.482332000  | -1.316298000 |
| C | -4.858396000 | 1.364598000  | -0.772589000 |

|   |              |              |              |
|---|--------------|--------------|--------------|
| C | -2.239095000 | 0.258252000  | 1.672322000  |
| C | -2.811700000 | -0.898484000 | 2.208433000  |
| H | -4.529292000 | -2.203606000 | 2.204539000  |
| H | -5.751200000 | -0.893936000 | 0.488192000  |
| C | -4.213185000 | 0.589319000  | 0.246285000  |
| H | -1.248093000 | 0.585731000  | 1.975339000  |
| H | -2.259442000 | -1.476330000 | 2.942526000  |
| C | -2.920509000 | 0.992106000  | 0.699515000  |
| N | -2.347882000 | 2.131254000  | 0.143477000  |
| H | -5.840375000 | 1.067775000  | -1.124716000 |
| C | -2.954040000 | 2.850912000  | -0.872789000 |
| H | -2.412798000 | 3.719397000  | -1.226007000 |
| H | -4.678958000 | 3.074598000  | -2.092526000 |

**TS1<sub>D</sub>**

|    |              |              |              |
|----|--------------|--------------|--------------|
| Co | -0.020537000 | -1.218867000 | -0.480180000 |
| P  | -1.248413000 | 0.370761000  | 0.371322000  |
| N  | -0.546411000 | -0.489892000 | -2.171421000 |
| C  | 0.767758000  | -2.520931000 | 0.988228000  |
| C  | 1.573485000  | -2.591921000 | -0.193058000 |
| C  | -1.133537000 | 0.732768000  | -2.282588000 |
| C  | -0.554139000 | -3.000444000 | 0.656617000  |
| C  | -2.214952000 | 2.619385000  | -1.130354000 |
| C  | -1.552893000 | 1.387517000  | -1.091867000 |
| C  | -0.585731000 | -3.292866000 | -0.728691000 |
| C  | -0.568697000 | 1.422502000  | 1.705614000  |
| C  | -2.944652000 | -0.104599000 | 0.924422000  |
| C  | -1.364855000 | 1.419208000  | -3.504145000 |
| H  | -1.042036000 | 0.962576000  | -4.437552000 |
| C  | 0.729133000  | -3.008303000 | -1.262202000 |
| C  | -2.446184000 | 3.282948000  | -2.335102000 |
| C  | 1.267589000  | -2.205053000 | 2.367731000  |
| H  | 2.004808000  | -1.399585000 | 2.348635000  |
| H  | 1.740178000  | -3.083614000 | 2.826590000  |
| H  | 0.453944000  | -1.892796000 | 3.025857000  |
| C  | -1.750720000 | -3.773512000 | -1.542379000 |
| H  | -2.671388000 | -3.785163000 | -0.954436000 |
| H  | -1.585679000 | -4.788595000 | -1.923560000 |
| H  | -1.915857000 | -3.115882000 | -2.403175000 |
| C  | -0.479028000 | 0.914911000  | 3.012249000  |
| H  | -0.892905000 | -0.061893000 | 3.242840000  |
| C  | -1.659839000 | -3.198900000 | 1.651226000  |
| H  | -1.725645000 | -2.365106000 | 2.355547000  |
| H  | -1.486992000 | -4.111599000 | 2.235029000  |
| H  | -2.634907000 | -3.283665000 | 1.169725000  |
| C  | 3.045763000  | -2.330227000 | -0.286709000 |

|   |              |              |              |
|---|--------------|--------------|--------------|
| H | 3.305371000  | -1.813976000 | -1.213961000 |
| H | 3.603882000  | -3.275504000 | -0.262099000 |
| H | 3.399005000  | -1.713017000 | 0.540028000  |
| C | -2.000044000 | 2.650764000  | -3.514607000 |
| H | -2.163179000 | 3.147573000  | -4.469481000 |
| C | -3.632894000 | -0.974502000 | 0.060594000  |
| H | -3.134800000 | -1.326545000 | -0.838459000 |
| C | 0.135891000  | 1.655375000  | 4.021715000  |
| H | 0.197918000  | 1.249311000  | 5.027309000  |
| C | -0.015617000 | 2.680147000  | 1.424910000  |
| H | -0.037548000 | 3.060875000  | 0.411582000  |
| C | 1.153090000  | -3.201929000 | -2.687692000 |
| H | 0.301067000  | -3.125427000 | -3.369868000 |
| H | 1.601495000  | -4.191655000 | -2.839599000 |
| H | 1.895304000  | -2.454234000 | -2.983083000 |
| C | -3.586646000 | 0.356707000  | 2.079273000  |
| H | -3.082036000 | 1.046315000  | 2.747460000  |
| C | -4.931013000 | -1.383246000 | 0.353863000  |
| H | -5.452072000 | -2.054468000 | -0.323276000 |
| C | 0.673013000  | 2.913244000  | 3.735782000  |
| H | 1.156451000  | 3.489625000  | 4.519239000  |
| C | 0.595187000  | 3.420970000  | 2.437912000  |
| H | 1.025894000  | 4.390560000  | 2.206122000  |
| C | -4.887188000 | -0.063106000 | 2.376724000  |
| H | -5.374102000 | 0.298187000  | 3.278341000  |
| C | -5.559769000 | -0.933854000 | 1.519963000  |
| H | -6.569828000 | -1.257625000 | 1.754315000  |
| H | -2.547824000 | 3.072613000  | -0.198602000 |
| H | -0.227761000 | -0.883464000 | -3.049340000 |
| H | 0.990758000  | -0.107575000 | -0.378396000 |
| H | 1.408272000  | 0.622681000  | -2.490417000 |
| C | -3.137603000 | 4.624590000  | -2.388359000 |
| H | -2.482386000 | 5.404976000  | -2.796269000 |
| H | -4.031804000 | 4.595609000  | -3.023348000 |
| H | -3.452715000 | 4.948966000  | -1.391736000 |
| C | 4.212104000  | 0.694159000  | 2.286077000  |
| C | 3.102067000  | 0.943152000  | 1.496916000  |
| C | 3.206619000  | 0.990820000  | 0.077601000  |
| C | 4.499279000  | 0.765017000  | -0.511686000 |
| C | 5.604301000  | 0.528120000  | 0.313483000  |
| C | 5.474874000  | 0.488627000  | 1.700964000  |
| H | 4.103890000  | 0.661518000  | 3.366881000  |
| H | 2.126799000  | 1.097314000  | 1.939236000  |
| C | 4.593874000  | 0.753235000  | -1.959273000 |
| H | 6.575379000  | 0.359489000  | -0.147105000 |
| H | 6.342917000  | 0.297902000  | 2.324781000  |

|   |             |             |              |
|---|-------------|-------------|--------------|
| C | 3.505398000 | 0.993575000 | -2.710107000 |
| C | 2.177899000 | 1.300995000 | -2.086423000 |
| H | 5.558102000 | 0.534789000 | -2.413066000 |
| H | 3.557267000 | 0.976922000 | -3.796640000 |
| H | 1.830633000 | 2.301931000 | -2.403073000 |
| N | 2.081393000 | 1.230976000 | -0.639677000 |

**TS1<sub>E</sub>**

|    |              |              |              |
|----|--------------|--------------|--------------|
| Co | 1.332647000  | -1.345197000 | 0.398381000  |
| P  | 1.020036000  | 0.734113000  | -0.269065000 |
| N  | 0.885255000  | -0.720279000 | 2.143218000  |
| C  | 0.973605000  | -3.234304000 | -0.570677000 |
| C  | 1.635615000  | -3.405823000 | 0.684130000  |
| C  | 0.811841000  | 0.630920000  | 2.417579000  |
| C  | 1.812130000  | -2.412009000 | -1.379679000 |
| C  | 0.623931000  | 2.923027000  | 1.555680000  |
| C  | 0.779759000  | 1.549261000  | 1.335882000  |
| C  | 3.057378000  | -2.172879000 | -0.664961000 |
| C  | -0.410260000 | 1.124432000  | -1.357091000 |
| C  | 2.432731000  | 1.596270000  | -1.064983000 |
| C  | 0.699113000  | 1.168506000  | 3.720832000  |
| H  | 0.710159000  | 0.493142000  | 4.572791000  |
| C  | 2.940469000  | -2.778562000 | 0.601368000  |
| C  | 0.506068000  | 3.445503000  | 2.843041000  |
| C  | -0.387255000 | -3.764554000 | -0.922888000 |
| H  | -1.111908000 | -3.548572000 | -0.131828000 |
| H  | -0.367045000 | -4.851512000 | -1.073444000 |
| H  | -0.761911000 | -3.315857000 | -1.847042000 |
| C  | 4.246246000  | -1.438040000 | -1.212096000 |
| H  | 3.948281000  | -0.621205000 | -1.873245000 |
| H  | 4.897037000  | -2.108687000 | -1.788922000 |
| H  | 4.848678000  | -0.997745000 | -0.413200000 |
| C  | -1.282505000 | 0.085970000  | -1.713401000 |
| H  | -1.084168000 | -0.916755000 | -1.351553000 |
| C  | 1.554063000  | -1.994173000 | -2.799792000 |
| H  | 0.487095000  | -1.873094000 | -3.001937000 |
| H  | 1.946088000  | -2.737297000 | -3.506185000 |
| H  | 2.040108000  | -1.041580000 | -3.026284000 |
| C  | 1.131476000  | -4.203423000 | 1.850318000  |
| H  | 1.452732000  | -3.766639000 | 2.801378000  |
| H  | 1.509781000  | -5.233699000 | 1.822633000  |
| H  | 0.040271000  | -4.242189000 | 1.860397000  |
| C  | 0.552924000  | 2.533810000  | 3.916090000  |
| H  | 0.467483000  | 2.912985000  | 4.932772000  |
| C  | 3.517367000  | 2.000304000  | -0.270345000 |
| H  | 3.453110000  | 1.905221000  | 0.809498000  |

|   |              |              |              |
|---|--------------|--------------|--------------|
| C | -2.411504000 | 0.344270000  | -2.490805000 |
| H | -3.091249000 | -0.465107000 | -2.739025000 |
| C | -0.679268000 | 2.426058000  | -1.807644000 |
| H | 0.000423000  | 3.236897000  | -1.563505000 |
| C | 3.949790000  | -2.762730000 | 1.711156000  |
| H | 4.714700000  | -2.000140000 | 1.544843000  |
| H | 4.457140000  | -3.731220000 | 1.806622000  |
| H | 3.473166000  | -2.547390000 | 2.672943000  |
| C | 2.522835000  | 1.731473000  | -2.458888000 |
| H | 1.689098000  | 1.433401000  | -3.086879000 |
| C | 4.666877000  | 2.525466000  | -0.858829000 |
| H | 5.497565000  | 2.837213000  | -0.231950000 |
| C | -2.678274000 | 1.643491000  | -2.923689000 |
| H | -3.565506000 | 1.847547000  | -3.515434000 |
| C | -1.808583000 | 2.683351000  | -2.584776000 |
| H | -2.011089000 | 3.695534000  | -2.923670000 |
| C | 3.676202000  | 2.256920000  | -3.045393000 |
| H | 3.731658000  | 2.358044000  | -4.125653000 |
| C | 4.751533000  | 2.652219000  | -2.248013000 |
| H | 5.648450000  | 3.060235000  | -2.705008000 |
| H | 0.612815000  | 3.601467000  | 0.705662000  |
| H | 1.065221000  | -1.282800000 | 2.968653000  |
| B | -1.373011000 | -1.168196000 | 1.857001000  |
| H | -1.256592000 | -2.359966000 | 1.851969000  |
| H | -1.640289000 | -0.598647000 | 2.873503000  |
| H | -1.265419000 | -0.547430000 | 0.851275000  |
| C | 0.343735000  | 4.926612000  | 3.091101000  |
| H | -0.590919000 | 5.147547000  | 3.621471000  |
| H | 1.160365000  | 5.327721000  | 3.704142000  |
| H | 0.330517000  | 5.488806000  | 2.152163000  |
| C | -4.188765000 | 2.171330000  | 0.303869000  |
| C | -3.627370000 | 1.052628000  | 0.876050000  |
| C | -4.130337000 | -0.236926000 | 0.555895000  |
| C | -5.224965000 | -0.354052000 | -0.360822000 |
| C | -5.784257000 | 0.822695000  | -0.925454000 |
| C | -5.274565000 | 2.059072000  | -0.600475000 |
| H | -3.789189000 | 3.152860000  | 0.539879000  |
| H | -2.790363000 | 1.123483000  | 1.559103000  |
| C | -5.690903000 | -1.657662000 | -0.668637000 |
| H | -6.616858000 | 0.728294000  | -1.618204000 |
| H | -5.701079000 | 2.956028000  | -1.040110000 |
| C | -5.085155000 | -2.748340000 | -0.089316000 |
| C | -4.005587000 | -2.531483000 | 0.801883000  |
| H | -6.520202000 | -1.777668000 | -1.361595000 |
| H | -5.413036000 | -3.760421000 | -0.303428000 |
| H | -3.494605000 | -3.374473000 | 1.262639000  |

|   |              |              |             |
|---|--------------|--------------|-------------|
| N | -3.545868000 | -1.338079000 | 1.118371000 |
|---|--------------|--------------|-------------|

**Int1E**

|    |              |              |              |
|----|--------------|--------------|--------------|
| Co | -1.520189000 | 0.092982000  | -0.490465000 |
| P  | 0.801355000  | -0.353577000 | -0.108813000 |
| N  | -0.671469000 | 1.844427000  | -1.423314000 |
| C  | -3.846029000 | 0.153348000  | -0.372312000 |
| C  | -3.361376000 | 1.237739000  | 0.417144000  |
| C  | 0.647835000  | 2.210920000  | -1.082432000 |
| C  | -3.351228000 | -1.062689000 | 0.200089000  |
| C  | 2.841779000  | 1.633448000  | -0.178950000 |
| C  | 1.529614000  | 1.264782000  | -0.512938000 |
| C  | -2.573937000 | -0.725871000 | 1.357986000  |
| C  | 1.468641000  | -1.615063000 | -1.255239000 |
| C  | 1.500030000  | -0.795114000 | 1.529587000  |
| C  | 1.120125000  | 3.520709000  | -1.271202000 |
| H  | 0.455122000  | 4.263980000  | -1.703821000 |
| C  | -2.575608000 | 0.700173000  | 1.485641000  |
| C  | 3.315339000  | 2.929471000  | -0.386084000 |
| C  | -4.709517000 | 0.271439000  | -1.595152000 |
| H  | -4.437859000 | 1.146394000  | -2.193798000 |
| H  | -5.772166000 | 0.364582000  | -1.334946000 |
| H  | -4.605102000 | -0.603541000 | -2.242471000 |
| C  | -1.929457000 | -1.704782000 | 2.299668000  |
| H  | -1.556651000 | -2.587292000 | 1.769193000  |
| H  | -2.636404000 | -2.060156000 | 3.060902000  |
| H  | -1.076135000 | -1.263972000 | 2.820997000  |
| C  | 0.655835000  | -2.723987000 | -1.535739000 |
| H  | -0.339270000 | -2.784637000 | -1.101236000 |
| C  | -3.647146000 | -2.453571000 | -0.288574000 |
| H  | -3.731897000 | -2.486994000 | -1.379276000 |
| H  | -4.588901000 | -2.839628000 | 0.123704000  |
| H  | -2.859220000 | -3.156201000 | 0.002012000  |
| C  | -3.626476000 | 2.695394000  | 0.173091000  |
| H  | -2.791567000 | 3.316651000  | 0.514895000  |
| H  | -4.522620000 | 3.044182000  | 0.703223000  |
| H  | -3.784620000 | 2.901383000  | -0.890855000 |
| C  | 2.421988000  | 3.867505000  | -0.929123000 |
| H  | 2.757094000  | 4.889833000  | -1.089094000 |
| C  | 1.521463000  | 0.176722000  | 2.544568000  |
| H  | 1.231793000  | 1.198270000  | 2.318723000  |
| C  | 1.110746000  | -3.735509000 | -2.382405000 |
| H  | 0.474364000  | -4.589334000 | -2.595828000 |
| C  | 2.734645000  | -1.520873000 | -1.848309000 |
| H  | 3.359236000  | -0.654012000 | -1.658230000 |
| C  | -1.922975000 | 1.503797000  | 2.574986000  |



|   |              |              |              |
|---|--------------|--------------|--------------|
| H | -1.156100000 | 0.924999000  | 3.095421000  |
| H | -2.651305000 | 1.833904000  | 3.327619000  |
| H | -1.441315000 | 2.404949000  | 2.178050000  |
| C | 1.884453000  | -2.108308000 | 1.835997000  |
| H | 1.877269000  | -2.870344000 | 1.062984000  |
| C | 1.917284000  | -0.161134000 | 3.837710000  |
| H | 1.931523000  | 0.600802000  | 4.611828000  |
| C | 2.375424000  | -3.637916000 | -2.965812000 |
| H | 2.727654000  | -4.419451000 | -3.632822000 |
| C | 3.183204000  | -2.528660000 | -2.701735000 |
| H | 4.162361000  | -2.446411000 | -3.164693000 |
| C | 2.277720000  | -2.443094000 | 3.133130000  |
| H | 2.575061000  | -3.463701000 | 3.356663000  |
| C | 2.292960000  | -1.473678000 | 4.137079000  |
| H | 2.598082000  | -1.736955000 | 5.145583000  |
| H | 3.492420000  | 0.900513000  | 0.291906000  |
| H | -1.272447000 | 2.660641000  | -1.439114000 |
| B | -0.951001000 | 0.911250000  | -2.685825000 |
| H | -1.732419000 | 1.443108000  | -3.439432000 |
| H | 0.080997000  | 0.533174000  | -3.181166000 |
| H | -1.554030000 | -0.149726000 | -2.276579000 |
| C | 4.734166000  | 3.316295000  | -0.042049000 |
| H | 5.342425000  | 3.443897000  | -0.946058000 |
| H | 4.769423000  | 4.264274000  | 0.505767000  |
| H | 5.218253000  | 2.553785000  | 0.575298000  |

### Int2<sub>E</sub>

|    |              |              |              |
|----|--------------|--------------|--------------|
| Co | -0.426599000 | 1.214344000  | -0.142239000 |
| P  | 1.312719000  | -0.077760000 | 0.203196000  |
| N  | -0.437001000 | -1.219127000 | -2.219290000 |
| C  | -1.939197000 | 2.629538000  | -0.305907000 |
| C  | -1.350165000 | 2.468015000  | -1.602455000 |
| C  | 0.776001000  | -1.836173000 | -1.981733000 |
| C  | -0.936927000 | 3.188747000  | 0.577367000  |
| C  | 2.989946000  | -2.009307000 | -0.947788000 |
| C  | 1.730726000  | -1.375371000 | -1.030699000 |
| C  | 0.261961000  | 3.319391000  | -0.158385000 |
| C  | 1.152107000  | -1.008969000 | 1.803888000  |
| C  | 2.913650000  | 0.821463000  | 0.405340000  |
| C  | 1.119544000  | -2.991550000 | -2.730945000 |
| H  | 0.397380000  | -3.362413000 | -3.449166000 |
| C  | 0.023230000  | 2.839800000  | -1.504168000 |
| C  | 3.326740000  | -3.122937000 | -1.708528000 |
| C  | -3.383007000 | 2.425185000  | 0.048280000  |
| H  | -3.852364000 | 1.685333000  | -0.601376000 |
| H  | -3.950372000 | 3.361334000  | -0.045593000 |

|   |              |              |              |
|---|--------------|--------------|--------------|
| H | -3.492169000 | 2.069388000  | 1.075701000  |
| C | 1.538868000  | 3.929146000  | 0.340963000  |
| H | 1.690912000  | 3.735116000  | 1.405988000  |
| H | 1.527911000  | 5.018456000  | 0.202016000  |
| H | 2.412325000  | 3.539878000  | -0.184362000 |
| C | 0.482697000  | -0.359538000 | 2.854387000  |
| H | 0.075115000  | 0.632161000  | 2.680518000  |
| C | -1.160902000 | 3.578971000  | 2.009406000  |
| H | -1.864393000 | 2.897934000  | 2.497692000  |
| H | -1.572849000 | 4.593857000  | 2.096619000  |
| H | -0.227278000 | 3.556205000  | 2.579775000  |
| C | -2.048906000 | 1.973424000  | -2.837731000 |
| H | -1.378090000 | 1.392002000  | -3.476806000 |
| H | -2.438596000 | 2.806888000  | -3.437341000 |
| H | -2.890930000 | 1.324167000  | -2.585086000 |
| C | 2.346224000  | -3.613640000 | -2.591590000 |
| H | 2.566953000  | -4.488373000 | -3.200208000 |
| C | 3.659035000  | 1.164533000  | -0.734733000 |
| H | 3.344629000  | 0.804763000  | -1.709233000 |
| C | 0.295193000  | -0.995228000 | 4.081275000  |
| H | -0.222431000 | -0.476832000 | 4.883833000  |
| C | 1.612063000  | -2.317426000 | 2.003365000  |
| H | 2.114215000  | -2.846116000 | 1.200816000  |
| C | 1.005506000  | 2.879598000  | -2.640356000 |
| H | 2.034307000  | 2.797238000  | -2.281947000 |
| H | 0.929905000  | 3.819799000  | -3.203397000 |
| H | 0.833332000  | 2.061516000  | -3.346555000 |
| C | 3.348634000  | 1.274559000  | 1.657906000  |
| H | 2.792442000  | 1.014207000  | 2.552631000  |
| C | 4.806840000  | 1.948723000  | -0.623278000 |
| H | 5.372594000  | 2.202833000  | -1.515226000 |
| C | 0.752465000  | -2.302728000 | 4.269997000  |
| H | 0.594881000  | -2.805462000 | 5.220200000  |
| C | 1.407073000  | -2.961688000 | 3.227387000  |
| H | 1.760178000  | -3.980314000 | 3.363016000  |
| C | 4.497766000  | 2.060243000  | 1.767621000  |
| H | 4.821954000  | 2.402398000  | 2.746491000  |
| C | 5.228062000  | 2.403294000  | 0.629111000  |
| H | 6.121246000  | 3.015111000  | 0.716139000  |
| H | 3.723213000  | -1.621236000 | -0.245576000 |
| H | -0.471756000 | -0.263177000 | -1.873885000 |
| B | -1.786432000 | -1.886193000 | -2.364889000 |
| H | -1.721677000 | -3.040052000 | -2.710925000 |
| H | -2.538549000 | -1.224456000 | -3.026796000 |
| H | -1.271921000 | 0.313594000  | 0.695364000  |
| C | -3.645540000 | -1.403872000 | -0.411736000 |

|   |              |              |              |
|---|--------------|--------------|--------------|
| C | -1.652349000 | -2.497579000 | 0.120777000  |
| C | -4.569275000 | -0.902906000 | -1.365055000 |
| C | -3.987565000 | -1.340678000 | 0.978094000  |
| C | -1.938602000 | -2.498316000 | 1.494762000  |
| H | -0.724109000 | -2.920978000 | -0.242681000 |
| C | -5.759435000 | -0.345150000 | -0.950792000 |
| H | -4.323282000 | -0.968518000 | -2.414673000 |
| C | -5.214427000 | -0.740585000 | 1.366129000  |
| C | -3.096297000 | -1.897740000 | 1.924521000  |
| H | -1.221346000 | -2.926990000 | 2.183928000  |
| C | -6.085714000 | -0.249894000 | 0.422565000  |
| H | -6.455960000 | 0.032224000  | -1.693392000 |
| H | -5.452757000 | -0.687691000 | 2.424838000  |
| H | -3.339696000 | -1.844340000 | 2.982005000  |
| H | -7.023833000 | 0.204506000  | 0.725558000  |
| N | -2.445648000 | -1.962461000 | -0.802246000 |
| C | 4.682475000  | -3.779493000 | -1.604176000 |
| H | 4.594820000  | -4.855392000 | -1.411279000 |
| H | 5.256357000  | -3.667687000 | -2.532654000 |
| H | 5.276823000  | -3.342857000 | -0.795795000 |

#### TS2<sub>EC1</sub>

|    |              |              |              |
|----|--------------|--------------|--------------|
| Co | -1.412059000 | -0.969564000 | -0.281509000 |
| P  | -0.269497000 | 0.784487000  | 0.373998000  |
| N  | -0.102920000 | -0.665521000 | -2.198175000 |
| C  | -2.775229000 | -2.597382000 | -0.526836000 |
| C  | -3.133731000 | -1.625180000 | -1.505478000 |
| C  | 0.504927000  | 0.630801000  | -2.260168000 |
| C  | -3.020630000 | -2.032260000 | 0.788655000  |
| C  | 1.244380000  | 2.672009000  | -1.156232000 |
| C  | 0.611635000  | 1.418475000  | -1.100426000 |
| C  | -3.443796000 | -0.703741000 | 0.608888000  |
| C  | 0.979736000  | 0.477069000  | 1.692620000  |
| C  | -1.113570000 | 2.301620000  | 1.008196000  |
| C  | 1.024511000  | 1.143284000  | -3.461944000 |
| H  | 0.949449000  | 0.538756000  | -4.360961000 |
| C  | -3.465783000 | -0.425236000 | -0.821219000 |
| C  | 1.788259000  | 3.166286000  | -2.341299000 |
| C  | -2.414820000 | -4.026293000 | -0.809408000 |
| H  | -1.806257000 | -4.114016000 | -1.715230000 |
| H  | -3.311367000 | -4.643012000 | -0.956705000 |
| H  | -1.854083000 | -4.470531000 | 0.018899000  |
| C  | -3.855391000 | 0.260658000  | 1.682557000  |
| H  | -3.334170000 | 0.064764000  | 2.624394000  |
| H  | -4.932964000 | 0.191338000  | 1.882622000  |
| H  | -3.640178000 | 1.294187000  | 1.404316000  |

|   |              |              |              |
|---|--------------|--------------|--------------|
| C | 0.616817000  | -0.417828000 | 2.710845000  |
| H | -0.325301000 | -0.952579000 | 2.627605000  |
| C | -2.834879000 | -2.758066000 | 2.089428000  |
| H | -1.929509000 | -3.374011000 | 2.072892000  |
| H | -3.679181000 | -3.423526000 | 2.314182000  |
| H | -2.739223000 | -2.058675000 | 2.925478000  |
| C | -3.114755000 | -1.839290000 | -2.990784000 |
| H | -3.057107000 | -0.890429000 | -3.534074000 |
| H | -4.025275000 | -2.347393000 | -3.334694000 |
| H | -2.264044000 | -2.457780000 | -3.296218000 |
| C | 1.653607000  | 2.381961000  | -3.499350000 |
| H | 2.048579000  | 2.752615000  | -4.442769000 |
| C | -1.768801000 | 3.150770000  | 0.100375000  |
| H | -1.685303000 | 2.964437000  | -0.965609000 |
| C | 1.466332000  | -0.639229000 | 3.795375000  |
| H | 1.172983000  | -1.332573000 | 4.578817000  |
| C | 2.221397000  | 1.122353000  | 1.761678000  |
| H | 2.538029000  | 1.783706000  | 0.963545000  |
| C | -3.970822000 | 0.839782000  | -1.454047000 |
| H | -3.815562000 | 1.702535000  | -0.802911000 |
| H | -5.046821000 | 0.780710000  | -1.667889000 |
| H | -3.461301000 | 1.046454000  | -2.400813000 |
| C | -1.225181000 | 2.569092000  | 2.380323000  |
| H | -0.723194000 | 1.931065000  | 3.100251000  |
| C | -2.520987000 | 4.233617000  | 0.554147000  |
| H | -3.019422000 | 4.880033000  | -0.162851000 |
| C | 2.698096000  | 0.015533000  | 3.861648000  |
| H | 3.365611000  | -0.161967000 | 4.700343000  |
| C | 3.076342000  | 0.887281000  | 2.838265000  |
| H | 4.044635000  | 1.377716000  | 2.870669000  |
| C | -1.980107000 | 3.652872000  | 2.833239000  |
| H | -2.055085000 | 3.845451000  | 3.899854000  |
| C | -2.632921000 | 4.486242000  | 1.923953000  |
| H | -3.220635000 | 5.328285000  | 2.277947000  |
| H | 1.277440000  | 3.290453000  | -0.263089000 |
| H | -0.793726000 | -0.721418000 | -2.941577000 |
| B | 0.890491000  | -1.867645000 | -2.472659000 |
| H | 1.693944000  | -1.626777000 | -3.346521000 |
| H | 0.216904000  | -2.839261000 | -2.749173000 |
| H | -0.277289000 | -1.845334000 | 0.314908000  |
| C | 2.825847000  | -1.605618000 | -0.696810000 |
| C | 0.896541000  | -2.900008000 | -0.227658000 |
| C | 3.518180000  | -0.674695000 | -1.504520000 |
| C | 3.389650000  | -1.960211000 | 0.566913000  |
| C | 1.452362000  | -3.329356000 | 1.023196000  |
| H | 0.110467000  | -3.486567000 | -0.677078000 |

|   |             |              |              |
|---|-------------|--------------|--------------|
| C | 4.716256000 | -0.129875000 | -1.076287000 |
| H | 3.096723000 | -0.383358000 | -2.455275000 |
| C | 4.623587000 | -1.403424000 | 0.962502000  |
| C | 2.671442000 | -2.869935000 | 1.405964000  |
| H | 0.864675000 | -3.995936000 | 1.644804000  |
| C | 5.285491000 | -0.495781000 | 0.157859000  |
| H | 5.222195000 | 0.592564000  | -1.710530000 |
| H | 5.031415000 | -1.687425000 | 1.928744000  |
| H | 3.113793000 | -3.172461000 | 2.350854000  |
| H | 6.229540000 | -0.063793000 | 0.475509000  |
| N | 1.638870000 | -2.189027000 | -1.114829000 |
| C | 2.494289000 | 4.500645000  | -2.387513000 |
| H | 3.578917000 | 4.371834000  | -2.489945000 |
| H | 2.160112000 | 5.101206000  | -3.240513000 |
| H | 2.315843000 | 5.080054000  | -1.476988000 |

**TS2<sub>EC3</sub>**

|    |              |              |              |
|----|--------------|--------------|--------------|
| Co | -0.792257000 | 1.062363000  | 0.156450000  |
| P  | 1.382799000  | -0.004563000 | 0.230182000  |
| N  | -0.255527000 | -1.578434000 | -2.058487000 |
| C  | -2.543159000 | 2.296133000  | -0.554667000 |
| C  | -1.893673000 | 1.816494000  | -1.732685000 |
| C  | 1.035549000  | -1.968835000 | -1.808896000 |
| C  | -1.611104000 | 3.121805000  | 0.159947000  |
| C  | 3.287090000  | -1.707978000 | -0.848397000 |
| C  | 1.933936000  | -1.295523000 | -0.928083000 |
| C  | -0.398842000 | 3.180755000  | -0.600578000 |
| C  | 1.513638000  | -0.715155000 | 1.928006000  |
| C  | 2.737999000  | 1.249922000  | 0.173382000  |
| C  | 1.550464000  | -3.112351000 | -2.483539000 |
| H  | 0.879413000  | -3.649203000 | -3.143379000 |
| C  | -0.575717000 | 2.370642000  | -1.767821000 |
| C  | 3.778456000  | -2.805617000 | -1.537959000 |
| C  | -3.974509000 | 2.069615000  | -0.175340000 |
| H  | -4.376304000 | 1.166228000  | -0.635284000 |
| H  | -4.600197000 | 2.914357000  | -0.494677000 |
| H  | -4.093773000 | 1.963555000  | 0.905950000  |
| C  | 0.780095000  | 4.055007000  | -0.278442000 |
| H  | 0.994370000  | 4.069880000  | 0.794036000  |
| H  | 0.591200000  | 5.091994000  | -0.585991000 |
| H  | 1.689319000  | 3.721424000  | -0.780220000 |
| C  | 0.895246000  | -0.011072000 | 2.975216000  |
| H  | 0.375115000  | 0.920667000  | 2.767391000  |
| C  | -1.908653000 | 3.889650000  | 1.416921000  |
| H  | -2.594536000 | 3.337514000  | 2.066615000  |
| H  | -2.375410000 | 4.859013000  | 1.196363000  |

|   |              |              |              |
|---|--------------|--------------|--------------|
| H | -0.997838000 | 4.092026000  | 1.988801000  |
| C | -2.520111000 | 0.986451000  | -2.817560000 |
| H | -1.786897000 | 0.353223000  | -3.322969000 |
| H | -2.982851000 | 1.628263000  | -3.579358000 |
| H | -3.296949000 | 0.327081000  | -2.424807000 |
| C | 2.862920000  | -3.513158000 | -2.346815000 |
| H | 3.207550000  | -4.385284000 | -2.899001000 |
| C | 3.365137000  | 1.532396000  | -1.050996000 |
| H | 3.114617000  | 0.949570000  | -1.930659000 |
| C | 0.896438000  | -0.520335000 | 4.273645000  |
| H | 0.409828000  | 0.034037000  | 5.071027000  |
| C | 2.123808000  | -1.946004000 | 2.205000000  |
| H | 2.583604000  | -2.515632000 | 1.405251000  |
| C | 0.405028000  | 2.161628000  | -2.887258000 |
| H | 1.388343000  | 2.564863000  | -2.639741000 |
| H | 0.064394000  | 2.659235000  | -3.804072000 |
| H | 0.527484000  | 1.099484000  | -3.129338000 |
| C | 3.098407000  | 1.995562000  | 1.304878000  |
| H | 2.643287000  | 1.784386000  | 2.266522000  |
| C | 4.318597000  | 2.546620000  | -1.141834000 |
| H | 4.794252000  | 2.750444000  | -2.096856000 |
| C | 1.504165000  | -1.749253000 | 4.540171000  |
| H | 1.495268000  | -2.154841000 | 5.547657000  |
| C | 2.115488000  | -2.458633000 | 3.503528000  |
| H | 2.583522000  | -3.418260000 | 3.703440000  |
| C | 4.054021000  | 3.008274000  | 1.211301000  |
| H | 4.323375000  | 3.573893000  | 2.098712000  |
| C | 4.662693000  | 3.292206000  | -0.012162000 |
| H | 5.404472000  | 4.082145000  | -0.083600000 |
| H | 3.964486000  | -1.151632000 | -0.205190000 |
| H | -0.457268000 | -0.647213000 | -1.711597000 |
| B | -1.497559000 | -2.507052000 | -2.062066000 |
| H | -1.179870000 | -3.659667000 | -2.241781000 |
| H | -2.335111000 | -2.118948000 | -2.835851000 |
| H | -1.619089000 | 0.194730000  | 1.372847000  |
| C | -3.324186000 | -1.835169000 | -0.213556000 |
| C | -1.242584000 | -2.699657000 | 0.448274000  |
| C | -4.417875000 | -1.855298000 | -1.107459000 |
| C | -3.507397000 | -1.282398000 | 1.084132000  |
| C | -1.363786000 | -2.207628000 | 1.727883000  |
| H | -0.401036000 | -3.319892000 | 0.158111000  |
| C | -5.655135000 | -1.379121000 | -0.703530000 |
| H | -4.279176000 | -2.273738000 | -2.095539000 |
| C | -4.773261000 | -0.800975000 | 1.464812000  |
| C | -2.347342000 | -1.210312000 | 1.946651000  |
| H | -0.626470000 | -2.451859000 | 2.480339000  |

|   |              |              |              |
|---|--------------|--------------|--------------|
| C | -5.845303000 | -0.859527000 | 0.590676000  |
| H | -6.491713000 | -1.421863000 | -1.395076000 |
| H | -4.895067000 | -0.383391000 | 2.461085000  |
| H | -2.481830000 | -0.804129000 | 2.944969000  |
| H | -6.822246000 | -0.497185000 | 0.895361000  |
| N | -2.095984000 | -2.386856000 | -0.557555000 |
| C | 5.222901000  | -3.232862000 | -1.439375000 |
| H | 5.312512000  | -4.277393000 | -1.117226000 |
| H | 5.733245000  | -3.153313000 | -2.407302000 |
| H | 5.774693000  | -2.615400000 | -0.724053000 |

**Int3<sub>EC1</sub>**

|    |              |              |              |
|----|--------------|--------------|--------------|
| Co | -1.478438000 | -0.893657000 | -0.508329000 |
| P  | -0.326943000 | 0.723434000  | 0.482834000  |
| N  | -0.319138000 | -0.573645000 | -2.071983000 |
| C  | -2.585880000 | -2.760391000 | -0.422782000 |
| C  | -3.023534000 | -1.932754000 | -1.508976000 |
| C  | 0.273645000  | 0.729067000  | -2.154007000 |
| C  | -2.788883000 | -2.034663000 | 0.777996000  |
| C  | 1.174706000  | 2.671068000  | -1.001061000 |
| C  | 0.496158000  | 1.446483000  | -0.970632000 |
| C  | -3.437746000 | -0.780427000 | 0.436499000  |
| C  | 0.905104000  | 0.384057000  | 1.788526000  |
| C  | -1.303757000 | 2.147771000  | 1.128621000  |
| C  | 0.702255000  | 1.278125000  | -3.369490000 |
| H  | 0.539654000  | 0.726891000  | -4.291025000 |
| C  | -3.602353000 | -0.725216000 | -0.969278000 |
| C  | 1.644556000  | 3.204683000  | -2.202448000 |
| C  | -2.021462000 | -4.144328000 | -0.547526000 |
| H  | -1.355864000 | -4.227140000 | -1.410075000 |
| H  | -2.824606000 | -4.882834000 | -0.667668000 |
| H  | -1.447942000 | -4.421547000 | 0.340356000  |
| C  | -3.961653000 | 0.201851000  | 1.441799000  |
| H  | -3.269141000 | 0.343259000  | 2.275113000  |
| H  | -4.910776000 | -0.157981000 | 1.858839000  |
| H  | -4.137700000 | 1.184893000  | 1.003196000  |
| C  | 0.474499000  | -0.349796000 | 2.907715000  |
| H  | -0.540722000 | -0.731545000 | 2.943435000  |
| C  | -2.529059000 | -2.543676000 | 2.167590000  |
| H  | -1.545109000 | -3.016420000 | 2.248238000  |
| H  | -3.277757000 | -3.289273000 | 2.464385000  |
| H  | -2.572077000 | -1.735996000 | 2.902908000  |
| C  | -2.984353000 | -2.321898000 | -2.957609000 |
| H  | -3.052755000 | -1.446749000 | -3.611456000 |
| H  | -3.825185000 | -2.979057000 | -3.211611000 |
| H  | -2.060723000 | -2.857434000 | -3.196755000 |

|   |              |              |              |
|---|--------------|--------------|--------------|
| C | 1.376043000  | 2.495608000  | -3.385326000 |
| H | 1.709580000  | 2.904605000  | -4.335966000 |
| C | -2.097328000 | 2.856915000  | 0.210712000  |
| H | -2.069905000 | 2.588871000  | -0.841355000 |
| C | 1.344885000  | -0.593305000 | 3.967229000  |
| H | 1.003315000  | -1.160936000 | 4.828068000  |
| C | 2.228806000  | 0.834665000  | 1.728013000  |
| H | 2.599731000  | 1.338868000  | 0.843229000  |
| C | -4.245799000 | 0.374392000  | -1.764237000 |
| H | -4.266136000 | 1.310535000  | -1.200439000 |
| H | -5.280128000 | 0.129059000  | -2.038086000 |
| H | -3.701320000 | 0.566190000  | -2.694995000 |
| C | -1.342973000 | 2.505858000  | 2.481219000  |
| H | -0.728074000 | 1.978080000  | 3.202627000  |
| C | -2.917258000 | 3.897731000  | 0.640172000  |
| H | -3.522857000 | 4.439577000  | -0.080821000 |
| C | 2.659882000  | -0.123209000 | 3.909947000  |
| H | 3.343945000  | -0.322201000 | 4.729908000  |
| C | 3.099222000  | 0.580093000  | 2.789127000  |
| H | 4.130743000  | 0.908379000  | 2.715772000  |
| C | -2.171148000 | 3.547159000  | 2.910356000  |
| H | -2.192748000 | 3.815144000  | 3.962838000  |
| C | -2.960843000 | 4.242332000  | 1.994964000  |
| H | -3.602709000 | 5.051334000  | 2.331290000  |
| H | 1.316422000  | 3.226669000  | -0.077655000 |
| H | -0.858018000 | -0.734665000 | -2.921332000 |
| B | 0.839594000  | -1.783320000 | -2.158285000 |
| H | 1.476416000  | -1.546321000 | -3.159945000 |
| H | 0.170954000  | -2.790975000 | -2.281788000 |
| H | 0.919247000  | -3.756782000 | -0.396739000 |
| C | 2.941355000  | -1.276735000 | -0.753438000 |
| C | 1.190338000  | -2.815851000 | 0.108071000  |
| C | 3.411928000  | -0.299481000 | -1.658777000 |
| C | 3.805605000  | -1.613517000 | 0.331751000  |
| C | 2.123630000  | -3.116055000 | 1.239710000  |
| H | 0.232203000  | -2.444666000 | 0.527477000  |
| C | 4.652352000  | 0.313334000  | -1.494998000 |
| H | 2.795490000  | -0.011986000 | -2.496527000 |
| C | 5.051416000  | -0.992554000 | 0.467323000  |
| C | 3.340516000  | -2.571159000 | 1.324054000  |
| H | 1.765548000  | -3.817884000 | 1.989526000  |
| C | 5.492080000  | -0.021410000 | -0.430066000 |
| H | 4.960219000  | 1.065769000  | -2.217495000 |
| H | 5.676382000  | -1.279083000 | 1.311292000  |
| H | 4.003617000  | -2.812726000 | 2.151829000  |
| H | 6.459905000  | 0.454690000  | -0.306025000 |



|   |             |              |              |
|---|-------------|--------------|--------------|
| N | 1.689741000 | -1.862595000 | -0.895630000 |
| C | 2.426839000 | 4.495730000  | -2.231785000 |
| H | 3.505574000 | 4.296932000  | -2.246100000 |
| H | 2.193021000 | 5.088251000  | -3.122068000 |
| H | 2.219308000 | 5.110734000  | -1.351049000 |

**Int3<sub>EC3</sub>**

|    |              |              |              |
|----|--------------|--------------|--------------|
| Co | 0.372656000  | 1.046100000  | 0.202305000  |
| P  | -1.308568000 | -0.312425000 | -0.277588000 |
| N  | 0.236711000  | 0.381669000  | 2.097011000  |
| C  | 1.903449000  | 2.184811000  | -0.932541000 |
| C  | 1.775203000  | 2.733721000  | 0.376399000  |
| C  | -0.969767000 | -0.342426000 | 2.419135000  |
| C  | 0.633717000  | 2.316929000  | -1.571944000 |
| C  | -2.990671000 | -1.506644000 | 1.717473000  |
| C  | -1.807124000 | -0.818230000 | 1.400137000  |
| C  | -0.245548000 | 3.092824000  | -0.702932000 |
| C  | -1.090390000 | -1.807389000 | -1.321650000 |
| C  | -2.841324000 | 0.449336000  | -0.965412000 |
| C  | -1.330311000 | -0.591628000 | 3.753052000  |
| H  | -0.678154000 | -0.244888000 | 4.547883000  |
| C  | 0.444517000  | 3.319895000  | 0.494307000  |
| C  | -3.350575000 | -1.758446000 | 3.040240000  |
| C  | 3.136134000  | 1.589631000  | -1.550362000 |
| H  | 3.878248000  | 1.317443000  | -0.800066000 |
| H  | 3.601080000  | 2.300520000  | -2.245912000 |
| H  | 2.907076000  | 0.680368000  | -2.113010000 |
| C  | -1.591069000 | 3.626236000  | -1.092481000 |
| H  | -2.104480000 | 2.968586000  | -1.796161000 |
| H  | -1.487716000 | 4.606653000  | -1.576842000 |
| H  | -2.247964000 | 3.754642000  | -0.228730000 |
| C  | -0.363646000 | -1.659778000 | -2.511766000 |
| H  | 0.084275000  | -0.701855000 | -2.751128000 |
| C  | 0.333999000  | 1.993745000  | -3.007681000 |
| H  | 1.018619000  | 1.235269000  | -3.396595000 |
| H  | 0.448678000  | 2.885914000  | -3.637687000 |
| H  | -0.691243000 | 1.635941000  | -3.141170000 |
| C  | 2.868762000  | 2.925692000  | 1.384299000  |
| H  | 2.510802000  | 2.766929000  | 2.404991000  |
| H  | 3.265885000  | 3.948081000  | 1.326733000  |
| H  | 3.691297000  | 2.230092000  | 1.218928000  |
| C  | -2.496614000 | -1.284643000 | 4.051812000  |
| H  | -2.758055000 | -1.460044000 | 5.092712000  |
| C  | -3.672884000 | 1.201967000  | -0.120648000 |
| H  | -3.450265000 | 1.264114000  | 0.939838000  |
| C  | -0.183717000 | -2.744186000 | -3.370665000 |

|   |              |              |              |
|---|--------------|--------------|--------------|
| H | 0.391043000  | -2.618726000 | -4.283576000 |
| C | -1.631270000 | -3.060140000 | -1.001189000 |
| H | -2.169798000 | -3.202352000 | -0.071752000 |
| C | -0.055729000 | 4.052483000  | 1.703830000  |
| H | -1.147314000 | 4.113804000  | 1.715817000  |
| H | 0.335363000  | 5.077446000  | 1.740395000  |
| H | 0.264351000  | 3.563876000  | 2.630787000  |
| C | -3.146843000 | 0.380743000  | -2.332645000 |
| H | -2.528301000 | -0.210392000 | -2.999875000 |
| C | -4.783620000 | 1.870508000  | -0.633169000 |
| H | -5.419546000 | 2.445424000  | 0.033951000  |
| C | -0.719257000 | -3.990230000 | -3.042608000 |
| H | -0.569666000 | -4.838864000 | -3.703594000 |
| C | -1.441446000 | -4.144877000 | -1.856253000 |
| H | -1.851636000 | -5.115212000 | -1.591601000 |
| C | -4.254826000 | 1.059380000  | -2.844437000 |
| H | -4.478663000 | 0.996599000  | -3.905487000 |
| C | -5.075264000 | 1.806397000  | -1.997680000 |
| H | -5.938172000 | 2.331194000  | -2.396922000 |
| H | -3.659650000 | -1.813123000 | 0.917800000  |
| H | 0.250027000  | 1.207113000  | 2.694081000  |
| B | 1.640340000  | -0.394446000 | 2.538673000  |
| H | 1.344310000  | -1.151515000 | 3.442608000  |
| H | 2.361669000  | 0.494244000  | 2.908052000  |
| H | 2.263370000  | -1.711639000 | -1.928847000 |
| C | 3.487812000  | -0.978418000 | 0.779341000  |
| C | 1.509285000  | -2.289112000 | 0.901981000  |
| C | 4.487006000  | -0.238344000 | 1.443751000  |
| C | 3.825357000  | -1.601402000 | -0.448230000 |
| C | 1.762376000  | -2.943959000 | -0.241871000 |
| H | 0.734276000  | -2.618610000 | 1.588696000  |
| C | 5.752540000  | -0.071915000 | 0.885863000  |
| H | 4.263066000  | 0.198309000  | 2.407486000  |
| C | 5.109458000  | -1.445827000 | -0.972851000 |
| C | 2.769305000  | -2.379421000 | -1.203796000 |
| H | 1.194433000  | -3.828884000 | -0.503098000 |
| C | 6.077439000  | -0.672083000 | -0.332443000 |
| H | 6.494413000  | 0.514390000  | 1.422153000  |
| H | 5.344762000  | -1.932840000 | -1.917337000 |
| H | 3.235822000  | -3.164701000 | -1.812182000 |
| H | 7.065255000  | -0.551525000 | -0.767137000 |
| N | 2.207940000  | -1.156581000 | 1.332433000  |
| C | -4.614312000 | -2.509306000 | 3.385827000  |
| H | -4.385175000 | -3.492055000 | 3.814957000  |
| H | -5.211196000 | -1.966234000 | 4.126805000  |
| H | -5.239481000 | -2.670566000 | 2.502961000  |

**Int2<sub>F</sub>**

|    |              |              |              |
|----|--------------|--------------|--------------|
| Co | 0.439464000  | -1.400394000 | -0.392417000 |
| P  | -0.935706000 | 0.643927000  | 0.093294000  |
| N  | -1.165446000 | -1.665874000 | -1.750269000 |
| C  | 1.789682000  | -3.289026000 | 0.007608000  |
| C  | 0.418959000  | -3.673502000 | -0.045388000 |
| C  | -2.363858000 | -0.894974000 | -1.682590000 |
| C  | 1.983752000  | -2.505827000 | 1.186797000  |
| C  | -3.581341000 | 1.053373000  | -0.875390000 |
| C  | -2.420066000 | 0.263831000  | -0.895661000 |
| C  | 0.723944000  | -2.360041000 | 1.838602000  |
| C  | -0.480249000 | 2.337166000  | -0.475075000 |
| C  | -1.572245000 | 0.855060000  | 1.806170000  |
| C  | -3.507324000 | -1.261713000 | -2.412850000 |
| H  | -3.465652000 | -2.147209000 | -3.040315000 |
| C  | -0.251180000 | -3.077197000 | 1.071552000  |
| C  | -4.716300000 | 0.693496000  | -1.598765000 |
| C  | 2.859724000  | -3.708072000 | -0.959421000 |
| H  | 2.442512000  | -3.887015000 | -1.955274000 |
| H  | 3.364513000  | -4.630691000 | -0.641684000 |
| H  | 3.631774000  | -2.937326000 | -1.058437000 |
| C  | 0.487376000  | -1.716710000 | 3.176967000  |
| H  | 1.179040000  | -0.889678000 | 3.366379000  |
| H  | 0.627432000  | -2.437730000 | 3.993923000  |
| H  | -0.523801000 | -1.314652000 | 3.267496000  |
| C  | 0.276609000  | 2.423158000  | -1.655520000 |
| H  | 0.550770000  | 1.516075000  | -2.183806000 |
| C  | 3.318320000  | -2.024673000 | 1.675859000  |
| H  | 3.908817000  | -1.573202000 | 0.870945000  |
| H  | 3.911825000  | -2.855732000 | 2.079869000  |
| H  | 3.223181000  | -1.279267000 | 2.469016000  |
| C  | -0.176819000 | -4.627732000 | -1.042830000 |
| H  | -1.266577000 | -4.679823000 | -0.948382000 |
| H  | 0.199894000  | -5.646704000 | -0.887604000 |
| H  | 0.064269000  | -4.346485000 | -2.074270000 |
| C  | -4.659191000 | -0.487969000 | -2.360365000 |
| H  | -5.532406000 | -0.793326000 | -2.932703000 |
| C  | -2.716839000 | 0.159636000  | 2.228963000  |
| H  | -3.305073000 | -0.398049000 | 1.508389000  |
| C  | 0.656050000  | 3.664587000  | -2.162942000 |
| H  | 1.242618000  | 3.712317000  | -3.076024000 |
| C  | -0.868118000 | 3.520201000  | 0.170625000  |
| H  | -1.470235000 | 3.479323000  | 1.072026000  |
| C  | -1.702557000 | -3.264035000 | 1.417238000  |
| H  | -2.020923000 | -2.559453000 | 2.189080000  |

|   |              |              |              |
|---|--------------|--------------|--------------|
| H | -1.906569000 | -4.276003000 | 1.791397000  |
| H | -2.351423000 | -3.104436000 | 0.547662000  |
| C | -0.830056000 | 1.568736000  | 2.763756000  |
| H | 0.053975000  | 2.118537000  | 2.460666000  |
| C | -3.103212000 | 0.173822000  | 3.570164000  |
| H | -3.990064000 | -0.373225000 | 3.877290000  |
| C | 0.286764000  | 4.837750000  | -1.500945000 |
| H | 0.588884000  | 5.804922000  | -1.892728000 |
| C | -0.481217000 | 4.761739000  | -0.338061000 |
| H | -0.785901000 | 5.669961000  | 0.174759000  |
| C | -1.223503000 | 1.588904000  | 4.101400000  |
| H | -0.639493000 | 2.151576000  | 4.824451000  |
| C | -2.358124000 | 0.885913000  | 4.511824000  |
| H | -2.659991000 | 0.895295000  | 5.554985000  |
| H | -3.597749000 | 1.955116000  | -0.267858000 |
| H | -1.433508000 | -2.646006000 | -1.740934000 |
| B | -0.335163000 | -1.464113000 | -3.118462000 |
| H | -1.019911000 | -1.770614000 | -4.078096000 |
| H | 0.014120000  | -0.297445000 | -3.174832000 |
| H | 0.633307000  | -2.217551000 | -3.026093000 |
| C | 2.747126000  | 0.847676000  | -0.137567000 |
| C | 2.703493000  | -0.342821000 | -2.128881000 |
| C | 2.286228000  | 1.033762000  | 1.188708000  |
| C | 3.774649000  | 1.708430000  | -0.636374000 |
| C | 3.732157000  | 0.448036000  | -2.688109000 |
| H | 2.242410000  | -1.136215000 | -2.705005000 |
| C | 2.804077000  | 2.038774000  | 1.974314000  |
| H | 1.535265000  | 0.353420000  | 1.566255000  |
| C | 4.278927000  | 2.743637000  | 0.194354000  |
| C | 4.253744000  | 1.482643000  | -1.950410000 |
| H | 4.074885000  | 0.233509000  | -3.694373000 |
| C | 3.801489000  | 2.910076000  | 1.473768000  |
| H | 2.447037000  | 2.160745000  | 2.992816000  |
| H | 5.052776000  | 3.397097000  | -0.199384000 |
| H | 5.031080000  | 2.126989000  | -2.353015000 |
| H | 4.192781000  | 3.701716000  | 2.105252000  |
| N | 2.206510000  | -0.149995000 | -0.914405000 |
| C | -5.968289000 | 1.538176000  | -1.579166000 |
| H | -6.170671000 | 1.970684000  | -2.566289000 |
| H | -6.846991000 | 0.944463000  | -1.302140000 |
| H | -5.883294000 | 2.363737000  | -0.866697000 |

**TS2<sub>FC1</sub>**

|    |              |              |              |
|----|--------------|--------------|--------------|
| Co | 0.428234000  | -1.315764000 | 0.041091000  |
| P  | -0.765672000 | 0.826757000  | 0.043360000  |
| N  | -0.679663000 | -1.199424000 | -2.202799000 |

|   |              |              |              |
|---|--------------|--------------|--------------|
| C | 0.814140000  | -3.604486000 | 0.324689000  |
| C | -0.586569000 | -3.489879000 | 0.084522000  |
| C | -1.961522000 | -0.573069000 | -2.022258000 |
| C | 1.113838000  | -2.895502000 | 1.529418000  |
| C | -3.382093000 | 1.145000000  | -1.059839000 |
| C | -2.150775000 | 0.471724000  | -1.098383000 |
| C | -0.102767000 | -2.327064000 | 2.025773000  |
| C | -0.055534000 | 2.407997000  | -0.580379000 |
| C | -1.483433000 | 1.310472000  | 1.663420000  |
| C | -3.051838000 | -0.983025000 | -2.804310000 |
| H | -2.914156000 | -1.797778000 | -3.510067000 |
| C | -1.157166000 | -2.700179000 | 1.126688000  |
| C | -4.463261000 | 0.753175000  | -1.850336000 |
| C | 1.823360000  | -4.341392000 | -0.507431000 |
| H | 1.470814000  | -4.497615000 | -1.532083000 |
| H | 2.054301000  | -5.330540000 | -0.090079000 |
| H | 2.763939000  | -3.783125000 | -0.560464000 |
| C | -0.263600000 | -1.604358000 | 3.335491000  |
| H | 0.608073000  | -0.984831000 | 3.567611000  |
| H | -0.385095000 | -2.311569000 | 4.166653000  |
| H | -1.132538000 | -0.943770000 | 3.334275000  |
| C | 1.046593000  | 2.371303000  | -1.443675000 |
| H | 1.490728000  | 1.425695000  | -1.713699000 |
| C | 2.480443000  | -2.802655000 | 2.146082000  |
| H | 3.217190000  | -2.457818000 | 1.412521000  |
| H | 2.815376000  | -3.776448000 | 2.525237000  |
| H | 2.499474000  | -2.099749000 | 2.982270000  |
| C | -1.372364000 | -4.166377000 | -1.002557000 |
| H | -2.231882000 | -3.563588000 | -1.318983000 |
| H | -1.776754000 | -5.129639000 | -0.663678000 |
| H | -0.758620000 | -4.382400000 | -1.884835000 |
| C | -4.282891000 | -0.343981000 | -2.706549000 |
| H | -5.111057000 | -0.683688000 | -3.323708000 |
| C | -2.764025000 | 0.942714000  | 2.099977000  |
| H | -3.444602000 | 0.435789000  | 1.426817000  |
| C | 1.587619000  | 3.552698000  | -1.950382000 |
| H | 2.452833000  | 3.502930000  | -2.604260000 |
| C | -0.618177000 | 3.649785000  | -0.243023000 |
| H | -1.467409000 | 3.698821000  | 0.431278000  |
| C | -2.629497000 | -2.445286000 | 1.293655000  |
| H | -2.825766000 | -1.787163000 | 2.141708000  |
| H | -3.175013000 | -3.381137000 | 1.473321000  |
| H | -3.072654000 | -1.981415000 | 0.403992000  |
| C | -0.614626000 | 1.944274000  | 2.571876000  |
| H | 0.385649000  | 2.225463000  | 2.254709000  |
| C | -3.169453000 | 1.208128000  | 3.410491000  |

|   |              |              |              |
|---|--------------|--------------|--------------|
| H | -4.165168000 | 0.915562000  | 3.731509000  |
| C | 1.028627000  | 4.783392000  | -1.606100000 |
| H | 1.453277000  | 5.704136000  | -1.995901000 |
| C | -0.077702000 | 4.829173000  | -0.753675000 |
| H | -0.518653000 | 5.784278000  | -0.482295000 |
| C | -1.023624000 | 2.208584000  | 3.876972000  |
| H | -0.340179000 | 2.699016000  | 4.564163000  |
| C | -2.302786000 | 1.839799000  | 4.302508000  |
| H | -2.619258000 | 2.042079000  | 5.321493000  |
| H | -3.505282000 | 1.982092000  | -0.378541000 |
| H | -0.804025000 | -2.201411000 | -2.287816000 |
| B | 0.176881000  | -0.673094000 | -3.301468000 |
| H | 0.539104000  | -1.459246000 | -4.133502000 |
| H | 0.064402000  | 0.488488000  | -3.559545000 |
| H | 1.593068000  | -0.570309000 | -2.687894000 |
| C | 2.962220000  | 0.181772000  | -0.013706000 |
| C | 2.490179000  | -1.052447000 | -2.028631000 |
| C | 2.614068000  | 0.564259000  | 1.306422000  |
| C | 4.074694000  | 0.845947000  | -0.618041000 |
| C | 3.743590000  | -0.506226000 | -2.612457000 |
| H | 2.327122000  | -2.109214000 | -2.269548000 |
| C | 3.301209000  | 1.571445000  | 1.971267000  |
| H | 1.793507000  | 0.055546000  | 1.803931000  |
| C | 4.753348000  | 1.856582000  | 0.077642000  |
| C | 4.461327000  | 0.417987000  | -1.945406000 |
| H | 4.027262000  | -0.840351000 | -3.606279000 |
| C | 4.374216000  | 2.236988000  | 1.360890000  |
| H | 2.999346000  | 1.840503000  | 2.980824000  |
| H | 5.592313000  | 2.347672000  | -0.411547000 |
| H | 5.361626000  | 0.843277000  | -2.384540000 |
| H | 4.905051000  | 3.026175000  | 1.883556000  |
| N | 2.252708000  | -0.797415000 | -0.659879000 |
| C | -5.781230000 | 1.488607000  | -1.800671000 |
| H | -5.926330000 | 2.098606000  | -2.700400000 |
| H | -6.624513000 | 0.792135000  | -1.743225000 |
| H | -5.835683000 | 2.156877000  | -0.936597000 |

### Int3<sub>F</sub>

|    |              |              |              |
|----|--------------|--------------|--------------|
| Co | 0.778872000  | -0.835825000 | 0.076325000  |
| P  | -1.171908000 | 0.597769000  | 0.013609000  |
| N  | -1.774298000 | -1.102830000 | -2.421948000 |
| C  | 1.426073000  | -2.984327000 | -0.199162000 |
| C  | 0.061076000  | -2.995037000 | 0.239456000  |
| C  | -2.870689000 | -1.000973000 | -1.530046000 |
| C  | 2.226068000  | -2.452220000 | 0.859844000  |

|   |              |              |              |
|---|--------------|--------------|--------------|
| C | -3.849439000 | -0.211484000 | 0.545407000  |
| C | -2.760030000 | -0.254314000 | -0.335039000 |
| C | 1.358250000  | -2.102477000 | 1.938984000  |
| C | -1.088793000 | 1.924791000  | -1.257695000 |
| C | -1.435483000 | 1.538368000  | 1.566332000  |
| C | -4.078625000 | -1.641714000 | -1.823608000 |
| H | -4.155232000 | -2.216059000 | -2.740702000 |
| C | 0.021638000  | -2.452998000 | 1.564736000  |
| C | -5.054386000 | -0.863363000 | 0.263767000  |
| C | 1.947889000  | -3.517150000 | -1.503851000 |
| H | 1.181693000  | -3.490745000 | -2.285340000 |
| H | 2.281596000  | -4.559145000 | -1.411921000 |
| H | 2.801734000  | -2.930236000 | -1.856679000 |
| C | 1.820893000  | -1.565081000 | 3.266508000  |
| H | 2.496935000  | -0.712234000 | 3.142308000  |
| H | 2.364049000  | -2.330024000 | 3.835670000  |
| H | 0.981769000  | -1.242633000 | 3.890181000  |
| C | 0.119844000  | 2.628856000  | -1.380621000 |
| H | 0.969990000  | 2.352111000  | -0.766985000 |
| C | 3.715653000  | -2.275087000 | 0.838077000  |
| H | 4.076192000  | -2.075980000 | -0.174382000 |
| H | 4.230127000  | -3.171600000 | 1.209270000  |
| H | 4.026862000  | -1.430928000 | 1.458944000  |
| C | -1.084922000 | -3.680008000 | -0.452197000 |
| H | -2.046612000 | -3.230484000 | -0.192686000 |
| H | -1.134130000 | -4.739466000 | -0.166225000 |
| H | -0.991454000 | -3.645947000 | -1.541228000 |
| C | -5.154859000 | -1.565062000 | -0.944273000 |
| H | -6.081786000 | -2.075603000 | -1.192783000 |
| C | -0.707269000 | 1.165867000  | 2.703750000  |
| H | -0.017885000 | 0.331604000  | 2.641202000  |
| C | 0.237595000  | 3.659222000  | -2.313318000 |
| H | 1.178493000  | 4.194123000  | -2.402965000 |
| C | -2.172395000 | 2.265753000  | -2.079427000 |
| H | -3.110551000 | 1.726320000  | -1.996829000 |
| C | -1.207089000 | -2.387941000 | 2.428478000  |
| H | -1.105814000 | -1.658072000 | 3.236103000  |
| H | -1.416529000 | -3.359581000 | 2.895684000  |
| H | -2.094172000 | -2.110996000 | 1.850061000  |
| C | -2.305602000 | 2.638404000  | 1.634199000  |
| H | -2.853631000 | 2.949638000  | 0.749681000  |
| C | -0.856701000 | 1.869755000  | 3.900118000  |
| H | -0.283535000 | 1.574692000  | 4.774180000  |
| C | -0.842707000 | 3.991692000  | -3.134052000 |
| H | -0.746012000 | 4.788551000  | -3.865876000 |
| C | -2.046072000 | 3.293545000  | -3.015501000 |

|   |              |              |              |
|---|--------------|--------------|--------------|
| H | -2.888890000 | 3.545994000  | -3.652596000 |
| C | -2.456433000 | 3.337420000  | 2.830760000  |
| H | -3.131289000 | 4.187201000  | 2.877767000  |
| C | -1.733971000 | 2.952942000  | 3.965103000  |
| H | -1.849723000 | 3.504243000  | 4.893784000  |
| H | -3.762261000 | 0.352790000  | 1.468455000  |
| H | -0.882375000 | -1.225277000 | -1.949001000 |
| B | -1.779242000 | -1.021321000 | -3.819459000 |
| H | -0.738082000 | -1.142998000 | -4.390613000 |
| H | -2.809763000 | -0.835188000 | -4.392147000 |
| H | 1.856262000  | 0.880027000  | -2.836101000 |
| C | 3.160096000  | 0.792454000  | -0.184707000 |
| C | 2.265357000  | -0.001156000 | -2.300646000 |
| C | 2.951276000  | 1.317866000  | 1.112122000  |
| C | 4.482523000  | 0.849337000  | -0.724359000 |
| C | 3.684857000  | -0.247899000 | -2.747165000 |
| H | 1.622419000  | -0.840012000 | -2.603922000 |
| C | 3.998833000  | 1.866768000  | 1.846510000  |
| H | 1.945591000  | 1.292194000  | 1.524516000  |
| C | 5.515206000  | 1.414941000  | 0.031004000  |
| C | 4.712641000  | 0.198455000  | -2.007179000 |
| H | 3.846515000  | -0.746928000 | -3.699645000 |
| C | 5.290555000  | 1.926079000  | 1.310123000  |
| H | 3.802297000  | 2.266550000  | 2.838262000  |
| H | 6.517717000  | 1.434579000  | -0.392259000 |
| H | 5.741057000  | 0.061155000  | -2.335348000 |
| H | 6.104967000  | 2.364921000  | 1.878052000  |
| N | 2.131553000  | 0.178364000  | -0.854727000 |
| C | -6.202534000 | -0.830149000 | 1.244075000  |
| H | -6.128174000 | 0.027095000  | 1.919523000  |
| H | -7.166768000 | -0.774196000 | 0.728982000  |
| H | -6.217041000 | -1.735287000 | 1.863657000  |

**TS2<sub>GC1</sub>**

|    |              |              |              |
|----|--------------|--------------|--------------|
| Co | -1.151191000 | -1.149985000 | 0.439098000  |
| P  | -0.219566000 | 0.949919000  | 0.018493000  |
| N  | 0.978336000  | -0.500969000 | -2.407145000 |
| C  | -2.398003000 | -2.974587000 | 0.336838000  |
| C  | -2.145242000 | -2.487272000 | -0.985340000 |
| C  | 1.918641000  | 0.289741000  | -1.698304000 |
| C  | -3.080291000 | -1.945650000 | 1.033448000  |
| C  | 2.538014000  | 1.699235000  | 0.167899000  |
| C  | 1.545262000  | 1.004248000  | -0.537154000 |
| C  | -3.380560000 | -0.873674000 | 0.102096000  |
| C  | -0.260659000 | 2.122695000  | 1.462027000  |
| C  | -1.061306000 | 2.057133000  | -1.214864000 |



|   |              |              |              |
|---|--------------|--------------|--------------|
| C | 3.239510000  | 0.369234000  | -2.154932000 |
| H | 3.519573000  | -0.190997000 | -3.039411000 |
| C | -2.815830000 | -1.220323000 | -1.145559000 |
| C | 3.861340000  | 1.764472000  | -0.272773000 |
| C | -1.951354000 | -4.303954000 | 0.868952000  |
| H | -0.862161000 | -4.399463000 | 0.799208000  |
| H | -2.403101000 | -5.128946000 | 0.304810000  |
| H | -2.237984000 | -4.433224000 | 1.916714000  |
| C | -4.302996000 | 0.266842000  | 0.423149000  |
| H | -3.963097000 | 0.845312000  | 1.290505000  |
| H | -5.308642000 | -0.103445000 | 0.663412000  |
| H | -4.400317000 | 0.954365000  | -0.418268000 |
| C | -0.744413000 | 1.715108000  | 2.710070000  |
| H | -1.084117000 | 0.692758000  | 2.836174000  |
| C | -3.561312000 | -1.990007000 | 2.455819000  |
| H | -2.903874000 | -2.595327000 | 3.087515000  |
| H | -4.567768000 | -2.423338000 | 2.524755000  |
| H | -3.607331000 | -0.985958000 | 2.887786000  |
| C | -1.497618000 | -3.293441000 | -2.072457000 |
| H | -1.072945000 | -2.663684000 | -2.856889000 |
| H | -2.225186000 | -3.961768000 | -2.553732000 |
| H | -0.699258000 | -3.920930000 | -1.667039000 |
| C | 4.189540000  | 1.111190000  | -1.465521000 |
| H | 5.210957000  | 1.144940000  | -1.836003000 |
| C | -0.559596000 | 2.345313000  | -2.491022000 |
| H | 0.405899000  | 1.968210000  | -2.799983000 |
| C | -0.818854000 | 2.613343000  | 3.778507000  |
| H | -1.200691000 | 2.276625000  | 4.738303000  |
| C | 0.124757000  | 3.466547000  | 1.299307000  |
| H | 0.473700000  | 3.810800000  | 0.330687000  |
| C | -2.930745000 | -0.480593000 | -2.446997000 |
| H | -3.312578000 | 0.532135000  | -2.310145000 |
| H | -3.605717000 | -1.007005000 | -3.134598000 |
| H | -1.964116000 | -0.392963000 | -2.950998000 |
| C | -2.287573000 | 2.626484000  | -0.834992000 |
| H | -2.670441000 | 2.456786000  | 0.164378000  |
| C | -1.288770000 | 3.142206000  | -3.377171000 |
| H | -0.882999000 | 3.349322000  | -4.363358000 |
| C | -0.412490000 | 3.935969000  | 3.610338000  |
| H | -0.470199000 | 4.635556000  | 4.439416000  |
| C | 0.057465000  | 4.361945000  | 2.363994000  |
| H | 0.363486000  | 5.394261000  | 2.219862000  |
| C | -3.013690000 | 3.423542000  | -1.717659000 |
| H | -3.960751000 | 3.851187000  | -1.400424000 |
| C | -2.521871000 | 3.674138000  | -3.001007000 |
| H | -3.087125000 | 4.290865000  | -3.693715000 |

|   |              |              |              |
|---|--------------|--------------|--------------|
| H | 2.278676000  | 2.204643000  | 1.090678000  |
| H | 0.309943000  | -0.970579000 | -1.795675000 |
| B | 0.876638000  | -0.662413000 | -3.791822000 |
| H | 1.611267000  | -0.055238000 | -4.511614000 |
| H | 0.040724000  | -1.393254000 | -4.226903000 |
| H | -0.823653000 | -0.821446000 | 1.891097000  |
| C | 1.865540000  | -2.271374000 | 0.458631000  |
| C | 0.214452000  | -1.898896000 | 2.118582000  |
| C | 2.246908000  | -2.891764000 | -0.753150000 |
| C | 2.870812000  | -1.627540000 | 1.238910000  |
| C | 1.196383000  | -1.188594000 | 2.938925000  |
| H | -0.521186000 | -2.498056000 | 2.661036000  |
| C | 3.567236000  | -2.881116000 | -1.167216000 |
| H | 1.479185000  | -3.384514000 | -1.339047000 |
| C | 4.205685000  | -1.623901000 | 0.791375000  |
| C | 2.466208000  | -1.042449000 | 2.488043000  |
| H | 0.882712000  | -0.785321000 | 3.896820000  |
| C | 4.558407000  | -2.246573000 | -0.394349000 |
| H | 3.841230000  | -3.370340000 | -2.097987000 |
| H | 4.959138000  | -1.125564000 | 1.397245000  |
| H | 3.209691000  | -0.519664000 | 3.085497000  |
| H | 5.590915000  | -2.240792000 | -0.729887000 |
| N | 0.561008000  | -2.394400000 | 0.882927000  |
| C | 4.914803000  | 2.479332000  | 0.538620000  |
| H | 5.487094000  | 1.768051000  | 1.148025000  |
| H | 5.630506000  | 3.003389000  | -0.103211000 |
| H | 4.470826000  | 3.211037000  | 1.220159000  |

### TS1<sub>H</sub>

|    |              |              |              |
|----|--------------|--------------|--------------|
| Co | -1.352108000 | -0.152664000 | 0.441272000  |
| P  | 0.720907000  | 0.055970000  | -0.308772000 |
| N  | -0.545014000 | 0.077921000  | 2.191766000  |
| C  | -3.394148000 | 0.075744000  | -0.258081000 |
| C  | -3.334148000 | -0.627963000 | 0.980579000  |
| C  | 0.802924000  | -0.116150000 | 2.372584000  |
| C  | -2.631342000 | -0.668007000 | -1.204072000 |
| C  | 3.036274000  | -0.312941000 | 1.359488000  |
| C  | 1.652641000  | -0.131479000 | 1.232061000  |
| C  | -2.231848000 | -1.925838000 | -0.583364000 |
| C  | 1.123430000  | 1.699477000  | -1.041570000 |
| C  | 1.430506000  | -1.140653000 | -1.506419000 |
| C  | 1.424415000  | -0.275936000 | 3.634983000  |
| H  | 0.808478000  | -0.263541000 | 4.531281000  |
| C  | -2.655971000 | -1.895576000 | 0.753205000  |
| C  | 3.638608000  | -0.474777000 | 2.606926000  |
| C  | -4.044033000 | 1.411690000  | -0.469801000 |

|   |              |              |              |
|---|--------------|--------------|--------------|
| H | -3.888745000 | 2.061930000  | 0.396365000  |
| H | -5.125599000 | 1.313533000  | -0.628141000 |
| H | -3.628342000 | 1.924366000  | -1.342306000 |
| C | -1.530264000 | -3.043517000 | -1.297311000 |
| H | -0.837213000 | -2.667363000 | -2.053267000 |
| H | -2.250223000 | -3.696711000 | -1.808569000 |
| H | -0.949747000 | -3.664281000 | -0.609990000 |
| C | 0.121808000  | 2.346866000  | -1.779613000 |
| H | -0.847366000 | 1.869863000  | -1.884524000 |
| C | -2.449800000 | -0.356838000 | -2.663160000 |
| H | -2.610900000 | 0.704026000  | -2.874479000 |
| H | -3.161624000 | -0.922070000 | -3.279153000 |
| H | -1.444747000 | -0.617989000 | -3.007866000 |
| C | -3.966221000 | -0.199137000 | 2.272412000  |
| H | -3.477256000 | -0.675623000 | 3.127623000  |
| H | -5.029034000 | -0.470727000 | 2.314503000  |
| H | -3.887004000 | 0.882834000  | 2.409047000  |
| C | 2.796647000  | -0.448724000 | 3.736582000  |
| H | 3.237882000  | -0.576136000 | 4.723541000  |
| C | 1.877673000  | -2.392263000 | -1.054139000 |
| H | 1.899628000  | -2.600055000 | 0.011072000  |
| C | 0.352654000  | 3.605358000  | -2.338919000 |
| H | -0.429297000 | 4.094110000  | -2.914252000 |
| C | 2.355473000  | 2.339374000  | -0.856201000 |
| H | 3.127190000  | 1.864891000  | -0.259366000 |
| C | -2.416232000 | -2.931470000 | 1.811054000  |
| H | -1.749535000 | -3.720046000 | 1.453647000  |
| H | -3.352395000 | -3.404066000 | 2.133435000  |
| H | -1.950150000 | -2.483939000 | 2.695608000  |
| C | 1.410449000  | -0.882948000 | -2.885890000 |
| H | 1.078492000  | 0.084223000  | -3.251411000 |
| C | 2.294185000  | -3.363956000 | -1.963611000 |
| H | 2.641206000  | -4.326960000 | -1.599748000 |
| C | 1.585007000  | 4.236980000  | -2.149156000 |
| H | 1.765311000  | 5.219881000  | -2.575427000 |
| C | 2.582856000  | 3.602398000  | -1.405032000 |
| H | 3.538538000  | 4.094141000  | -1.246750000 |
| C | 1.821930000  | -1.860167000 | -3.793816000 |
| H | 1.801781000  | -1.647217000 | -4.858940000 |
| C | 2.263142000  | -3.103283000 | -3.335672000 |
| H | 2.584565000  | -3.862456000 | -4.042856000 |
| H | 3.650132000  | -0.363253000 | 0.462135000  |
| H | -1.085142000 | -0.085578000 | 3.034551000  |
| B | -1.018566000 | 2.206588000  | 1.712910000  |
| H | -1.791710000 | 2.325115000  | 2.619206000  |
| H | 0.134806000  | 2.496840000  | 1.804327000  |

|   |              |              |             |
|---|--------------|--------------|-------------|
| H | -1.446328000 | 1.855329000  | 0.635979000 |
| N | -1.356647000 | 4.328357000  | 0.919098000 |
| H | -1.015185000 | 5.019500000  | 1.580042000 |
| H | -0.758032000 | 4.350371000  | 0.097680000 |
| H | -2.295399000 | 4.593727000  | 0.636125000 |
| C | 5.127647000  | -0.681601000 | 2.753383000 |
| H | 5.591220000  | 0.117712000  | 3.345154000 |
| H | 5.358894000  | -1.627275000 | 3.259197000 |
| H | 5.625047000  | -0.699606000 | 1.778610000 |

**Int1<sub>H</sub>**

|    |              |              |              |
|----|--------------|--------------|--------------|
| Co | -1.509648000 | -0.422320000 | 0.482211000  |
| P  | 0.843480000  | 0.332557000  | 0.260450000  |
| N  | -0.648015000 | -2.210300000 | -0.215602000 |
| C  | -3.820208000 | -0.225374000 | 0.484770000  |
| C  | -3.413768000 | -0.807135000 | -0.754728000 |
| C  | 0.676700000  | -2.230914000 | -0.754179000 |
| C  | -3.333828000 | 1.118338000  | 0.519967000  |
| C  | 2.854340000  | -1.184677000 | -1.064642000 |
| C  | 1.531591000  | -1.129645000 | -0.593135000 |
| C  | -2.623873000 | 1.364545000  | -0.692346000 |
| C  | 1.981287000  | 0.489611000  | 1.710154000  |
| C  | 1.224173000  | 1.763367000  | -0.824875000 |
| C  | 1.164463000  | -3.359754000 | -1.434150000 |
| H  | 0.515146000  | -4.223099000 | -1.543908000 |
| C  | -2.658075000 | 0.169917000  | -1.476971000 |
| C  | 3.340046000  | -2.302440000 | -1.739593000 |
| C  | -4.653642000 | -0.925305000 | 1.522006000  |
| H  | -4.290718000 | -1.943298000 | 1.701997000  |
| H  | -5.704411000 | -1.003169000 | 1.213352000  |
| H  | -4.646882000 | -0.394784000 | 2.480183000  |
| C  | -2.089941000 | 2.698134000  | -1.125537000 |
| H  | -1.695060000 | 3.272427000  | -0.282619000 |
| H  | -2.882016000 | 3.305949000  | -1.585007000 |
| H  | -1.285212000 | 2.604942000  | -1.857753000 |
| C  | 1.899990000  | -0.535122000 | 2.671883000  |
| H  | 1.227520000  | -1.374407000 | 2.509540000  |
| C  | -3.555453000 | 2.129054000  | 1.609776000  |
| H  | -3.860977000 | 1.657533000  | 2.549873000  |
| H  | -4.344812000 | 2.846577000  | 1.348812000  |
| H  | -2.649601000 | 2.712537000  | 1.812233000  |
| C  | -3.785702000 | -2.188314000 | -1.216896000 |
| H  | -3.238304000 | -2.472480000 | -2.121481000 |
| H  | -4.853654000 | -2.253307000 | -1.462367000 |
| H  | -3.583772000 | -2.941715000 | -0.446857000 |
| C  | 2.463239000  | -3.386679000 | -1.924481000 |

|   |              |              |              |
|---|--------------|--------------|--------------|
| H | 2.816606000  | -4.272143000 | -2.448226000 |
| C | 1.469676000  | 1.600635000  | -2.197276000 |
| H | 1.551069000  | 0.604111000  | -2.617530000 |
| C | 2.709513000  | -0.509720000 | 3.806528000  |
| H | 2.637628000  | -1.313961000 | 4.533355000  |
| C | 2.909002000  | 1.523075000  | 1.903128000  |
| H | 3.020331000  | 2.306466000  | 1.162102000  |
| C | -2.052141000 | -0.008733000 | -2.841076000 |
| H | -1.208762000 | 0.671516000  | -2.992017000 |
| H | -2.776089000 | 0.182408000  | -3.644453000 |
| H | -1.673641000 | -1.026949000 | -2.983256000 |
| C | 1.106283000  | 3.067658000  | -0.313016000 |
| H | 0.876932000  | 3.218839000  | 0.738067000  |
| C | 1.606847000  | 2.713387000  | -3.029856000 |
| H | 1.792324000  | 2.568394000  | -4.090306000 |
| C | 3.613785000  | 0.537410000  | 4.002488000  |
| H | 4.241776000  | 0.559699000  | 4.888402000  |
| C | 3.714736000  | 1.546480000  | 3.044590000  |
| H | 4.428947000  | 2.354459000  | 3.177524000  |
| C | 1.263502000  | 4.176843000  | -1.142073000 |
| H | 1.175532000  | 5.176267000  | -0.725928000 |
| C | 1.511094000  | 4.003341000  | -2.505746000 |
| H | 1.622122000  | 4.866945000  | -3.154734000 |
| H | 3.506042000  | -0.327730000 | -0.911721000 |
| H | -1.270605000 | -2.595942000 | -0.921924000 |
| B | -0.848686000 | -3.161059000 | 1.081203000  |
| H | -2.003036000 | -2.980522000 | 1.462396000  |
| H | -0.666877000 | -4.325293000 | 0.779120000  |
| H | -0.049674000 | -2.807242000 | 1.937267000  |
| N | -1.413023000 | -0.413186000 | 2.645852000  |
| H | -1.288398000 | -1.404239000 | 2.859051000  |
| H | -0.645333000 | 0.100358000  | 3.070441000  |
| H | -2.285172000 | -0.097706000 | 3.060643000  |
| C | 4.758398000  | -2.361504000 | -2.255178000 |
| H | 5.323499000  | -3.166163000 | -1.770331000 |
| H | 4.783416000  | -2.556183000 | -3.333641000 |
| H | 5.290913000  | -1.423990000 | -2.071711000 |

### Int2<sub>H</sub>

|    |              |              |              |
|----|--------------|--------------|--------------|
| Co | -1.552005000 | -0.437983000 | 0.179299000  |
| P  | 0.540924000  | 0.278199000  | 0.180260000  |
| N  | 0.303572000  | -2.663397000 | -0.966068000 |
| C  | -3.556300000 | -0.971376000 | 0.040365000  |
| C  | -3.016297000 | -1.030852000 | -1.281192000 |
| C  | 1.531144000  | -2.030483000 | -1.124057000 |
| C  | -3.503114000 | 0.410957000  | 0.488189000  |

|   |              |              |              |
|---|--------------|--------------|--------------|
| C | 3.018328000  | -0.085393000 | -1.110339000 |
| C | 1.764661000  | -0.662760000 | -0.815773000 |
| C | -2.881841000 | 1.170720000  | -0.525225000 |
| C | 1.268662000  | 0.253111000  | 1.887693000  |
| C | 0.772726000  | 2.026513000  | -0.360183000 |
| C | 2.623094000  | -2.777494000 | -1.626088000 |
| H | 2.457021000  | -3.826642000 | -1.845402000 |
| C | -2.537730000 | 0.271018000  | -1.611330000 |
| C | 4.073950000  | -0.820578000 | -1.640471000 |
| C | -4.209650000 | -2.106797000 | 0.774158000  |
| H | -3.740927000 | -3.061304000 | 0.519605000  |
| H | -5.276441000 | -2.181310000 | 0.524398000  |
| H | -4.129112000 | -1.975706000 | 1.856232000  |
| C | -2.658461000 | 2.654964000  | -0.519183000 |
| H | -2.529089000 | 3.038693000  | 0.496617000  |
| H | -3.512776000 | 3.182061000  | -0.964309000 |
| H | -1.768280000 | 2.935140000  | -1.085556000 |
| C | 0.421887000  | 0.594696000  | 2.956126000  |
| H | -0.620205000 | 0.820033000  | 2.748735000  |
| C | -4.038348000 | 0.919654000  | 1.794806000  |
| H | -3.891055000 | 0.187342000  | 2.593386000  |
| H | -5.114322000 | 1.131254000  | 1.734373000  |
| H | -3.538528000 | 1.844455000  | 2.097239000  |
| C | -2.950028000 | -2.252290000 | -2.154464000 |
| H | -2.132039000 | -2.187048000 | -2.876875000 |
| H | -3.881798000 | -2.383069000 | -2.720209000 |
| H | -2.787044000 | -3.159228000 | -1.565999000 |
| C | 3.853076000  | -2.191719000 | -1.869956000 |
| H | 4.660265000  | -2.800782000 | -2.271874000 |
| C | 0.914139000  | 2.318761000  | -1.726552000 |
| H | 1.001963000  | 1.508607000  | -2.442937000 |
| C | 0.899096000  | 0.606258000  | 4.266379000  |
| H | 0.233671000  | 0.879900000  | 5.080459000  |
| C | 2.595146000  | -0.108138000 | 2.163765000  |
| H | 3.262136000  | -0.388069000 | 1.355628000  |
| C | -1.962944000 | 0.677129000  | -2.938300000 |
| H | -1.393332000 | 1.604759000  | -2.859999000 |
| H | -2.758400000 | 0.841887000  | -3.677128000 |
| H | -1.296716000 | -0.091411000 | -3.342334000 |
| C | 0.683837000  | 3.087456000  | 0.551909000  |
| H | 0.583301000  | 2.885011000  | 1.613065000  |
| C | 0.954432000  | 3.640995000  | -2.169278000 |
| H | 1.065534000  | 3.848820000  | -3.229724000 |
| C | 2.222946000  | 0.245767000  | 4.532237000  |
| H | 2.592326000  | 0.240147000  | 5.553865000  |
| C | 3.064923000  | -0.117622000 | 3.480354000  |

|   |              |              |              |
|---|--------------|--------------|--------------|
| H | 4.092789000  | -0.407503000 | 3.680375000  |
| C | 0.724571000  | 4.409743000  | 0.106773000  |
| H | 0.654898000  | 5.220073000  | 0.826905000  |
| C | 0.854968000  | 4.691580000  | -1.254004000 |
| H | 0.884704000  | 5.721033000  | -1.598792000 |
| H | 3.176184000  | 0.967168000  | -0.890642000 |
| H | -0.478652000 | -2.015030000 | -1.008325000 |
| B | 0.083385000  | -3.864197000 | -0.073105000 |
| H | 0.956991000  | -4.697822000 | -0.144390000 |
| H | -1.040741000 | -4.304529000 | -0.168650000 |
| H | -1.386276000 | -1.098798000 | 1.529889000  |
| N | 0.160974000  | -3.291252000 | 1.508130000  |
| C | 5.404289000  | -0.181836000 | -1.961049000 |
| H | 6.236221000  | -0.744641000 | -1.521974000 |
| H | 5.580376000  | -0.143572000 | -3.043345000 |
| H | 5.457419000  | 0.843568000  | -1.582968000 |
| H | -0.516351000 | -2.512564000 | 1.607434000  |
| H | -0.050138000 | -4.012039000 | 2.196357000  |
| H | 1.080954000  | -2.904708000 | 1.721124000  |

#### TS<sub>HCl</sub>

|    |              |              |              |
|----|--------------|--------------|--------------|
| Co | -0.373174000 | 0.899305000  | -0.459462000 |
| P  | 1.641859000  | -0.065191000 | 0.364759000  |
| N  | 0.250956000  | -0.069084000 | -2.328480000 |
| C  | -2.103021000 | 2.398800000  | -0.507101000 |
| C  | -1.087276000 | 2.857246000  | -1.405780000 |
| C  | 1.342520000  | -1.019047000 | -2.237037000 |
| C  | -1.569179000 | 2.456204000  | 0.822180000  |
| C  | 3.147120000  | -2.066022000 | -0.979257000 |
| C  | 2.066385000  | -1.170543000 | -1.037696000 |
| C  | -0.233860000 | 2.948264000  | 0.741406000  |
| C  | 1.387084000  | -1.123721000 | 1.844892000  |
| C  | 3.282522000  | 0.735460000  | 0.666924000  |
| C  | 1.713576000  | -1.812731000 | -3.336985000 |
| H  | 1.174780000  | -1.694958000 | -4.271127000 |
| C  | 0.070681000  | 3.184154000  | -0.634261000 |
| C  | 3.508119000  | -2.861823000 | -2.066779000 |
| C  | -3.509100000 | 2.035374000  | -0.891600000 |
| H  | -3.535580000 | 1.464818000  | -1.824265000 |
| H  | -4.128360000 | 2.931366000  | -1.035122000 |
| H  | -3.993479000 | 1.420498000  | -0.130765000 |
| C  | 0.681234000  | 3.227405000  | 1.900298000  |
| H  | 0.301076000  | 2.776365000  | 2.822112000  |
| H  | 0.773275000  | 4.305079000  | 2.090837000  |
| H  | 1.695272000  | 2.847351000  | 1.733143000  |
| C  | 1.035431000  | -0.462025000 | 3.035057000  |

|   |              |              |              |
|---|--------------|--------------|--------------|
| H | 0.958725000  | 0.620678000  | 3.044078000  |
| C | -2.292289000 | 2.094722000  | 2.089087000  |
| H | -3.187193000 | 1.506324000  | 1.879224000  |
| H | -2.601891000 | 2.988135000  | 2.648145000  |
| H | -1.664971000 | 1.490424000  | 2.753308000  |
| C | -1.246969000 | 3.109195000  | -2.878185000 |
| H | -0.329376000 | 2.886301000  | -3.436549000 |
| H | -1.486262000 | 4.162847000  | -3.077981000 |
| H | -2.043853000 | 2.499603000  | -3.307834000 |
| C | 2.767167000  | -2.717640000 | -3.249158000 |
| H | 3.033246000  | -3.309959000 | -4.121817000 |
| C | 3.843410000  | 1.454627000  | -0.403588000 |
| H | 3.337611000  | 1.469174000  | -1.364998000 |
| C | 0.778498000  | -1.181243000 | 4.201020000  |
| H | 0.517554000  | -0.652446000 | 5.113185000  |
| C | 1.433256000  | -2.524148000 | 1.841306000  |
| H | 1.677720000  | -3.058340000 | 0.929658000  |
| C | 1.335622000  | 3.794003000  | -1.168444000 |
| H | 2.175259000  | 3.644718000  | -0.484832000 |
| H | 1.228454000  | 4.876339000  | -1.325895000 |
| H | 1.619777000  | 3.363748000  | -2.136635000 |
| C | 3.952626000  | 0.732235000  | 1.898521000  |
| H | 3.547353000  | 0.179555000  | 2.739090000  |
| C | 5.040306000  | 2.149043000  | -0.247791000 |
| H | 5.457740000  | 2.697304000  | -1.087597000 |
| C | 0.833502000  | -2.578083000 | 4.188712000  |
| H | 0.619697000  | -3.141156000 | 5.092364000  |
| C | 1.151149000  | -3.245046000 | 3.004916000  |
| H | 1.182044000  | -4.330665000 | 2.983355000  |
| C | 5.150940000  | 1.434156000  | 2.054323000  |
| H | 5.658065000  | 1.419075000  | 3.015117000  |
| C | 5.698075000  | 2.144444000  | 0.985907000  |
| H | 6.628899000  | 2.689889000  | 1.110679000  |
| H | 3.725801000  | -2.130310000 | -0.061171000 |
| H | 0.614026000  | 0.773125000  | -2.777492000 |
| B | -0.979811000 | -0.491247000 | -3.229964000 |
| H | -0.683686000 | -0.569815000 | -4.409046000 |
| H | -1.889174000 | 0.276380000  | -3.044573000 |
| H | -1.003078000 | -0.428386000 | 0.378969000  |
| N | -1.481746000 | -1.938186000 | -2.761033000 |
| H | -0.716328000 | -2.610386000 | -2.697607000 |
| H | -2.029127000 | -1.933482000 | -1.811293000 |
| H | -2.125244000 | -2.298269000 | -3.463435000 |
| C | -6.189537000 | -0.756398000 | -0.990828000 |
| C | -4.922142000 | -1.266368000 | -1.211106000 |
| C | -4.004545000 | -1.417845000 | -0.142454000 |



|   |              |              |              |
|---|--------------|--------------|--------------|
| C | -4.434026000 | -1.064348000 | 1.177296000  |
| C | -5.732880000 | -0.554153000 | 1.371814000  |
| C | -6.603144000 | -0.390173000 | 0.305064000  |
| H | -6.870377000 | -0.629959000 | -1.828285000 |
| H | -4.599164000 | -1.537538000 | -2.212164000 |
| C | -3.504697000 | -1.280103000 | 2.252079000  |
| H | -6.042191000 | -0.285076000 | 2.379497000  |
| H | -7.597953000 | 0.013840000  | 0.465774000  |
| C | -2.233087000 | -1.670828000 | 1.981090000  |
| C | -1.829055000 | -1.830795000 | 0.599909000  |
| H | -3.836491000 | -1.116526000 | 3.274870000  |
| H | -1.495756000 | -1.816119000 | 2.761464000  |
| H | -0.907091000 | -2.375998000 | 0.412064000  |
| N | -2.753081000 | -1.904739000 | -0.387346000 |
| C | 4.648392000  | -3.847624000 | -1.977849000 |
| H | 4.276588000  | -4.875769000 | -1.888605000 |
| H | 5.278639000  | -3.809282000 | -2.872464000 |
| H | 5.282138000  | -3.649343000 | -1.108893000 |

#### TS2<sub>ic1</sub>

|    |              |              |              |
|----|--------------|--------------|--------------|
| Co | 0.031678000  | -1.364094000 | 0.082300000  |
| P  | -1.745356000 | 0.304885000  | 0.218874000  |
| N  | 0.230365000  | 1.224123000  | -2.113703000 |
| C  | 1.360841000  | -2.679179000 | -1.184221000 |
| C  | 0.159117000  | -2.423298000 | -1.928756000 |
| C  | -0.793614000 | 2.086039000  | -1.789949000 |
| C  | 0.999469000  | -3.437755000 | -0.027615000 |
| C  | -2.849095000 | 2.706398000  | -0.590980000 |
| C  | -1.819959000 | 1.774347000  | -0.853601000 |
| C  | -0.421098000 | -3.626835000 | -0.039109000 |
| C  | -1.666314000 | 1.080667000  | 1.896573000  |
| C  | -3.376432000 | -0.530700000 | 0.149043000  |
| C  | -0.867354000 | 3.362886000  | -2.408566000 |
| H  | -0.098087000 | 3.626379000  | -3.123513000 |
| C  | -0.934542000 | -3.028096000 | -1.229908000 |
| C  | -2.920329000 | 3.940560000  | -1.219198000 |
| C  | 2.751696000  | -2.297046000 | -1.607223000 |
| H  | 2.756755000  | -1.351144000 | -2.152663000 |
| H  | 3.185625000  | -3.063647000 | -2.262328000 |
| H  | 3.423816000  | -2.172738000 | -0.755513000 |
| C  | -1.202710000 | -4.415185000 | 0.974800000  |
| H  | -0.835496000 | -4.243381000 | 1.992775000  |
| H  | -1.128172000 | -5.494193000 | 0.786824000  |
| H  | -2.263708000 | -4.153576000 | 0.954572000  |
| C  | -0.533316000 | 1.873207000  | 2.156941000  |
| H  | 0.219521000  | 2.011335000  | 1.386084000  |

|   |              |              |              |
|---|--------------|--------------|--------------|
| C | 1.939396000  | -3.966375000 | 1.017741000  |
| H | 2.887790000  | -3.421379000 | 1.018722000  |
| H | 2.179090000  | -5.022786000 | 0.841607000  |
| H | 1.508952000  | -3.904848000 | 2.024333000  |
| C | 0.075856000  | -1.854921000 | -3.318786000 |
| H | -0.844150000 | -1.282832000 | -3.473433000 |
| H | 0.081703000  | -2.664488000 | -4.060730000 |
| H | 0.914278000  | -1.193872000 | -3.542813000 |
| C | -1.892264000 | 4.246393000  | -2.134750000 |
| H | -1.905610000 | 5.207516000  | -2.644720000 |
| C | -4.343800000 | -0.227836000 | -0.817996000 |
| H | -4.169536000 | 0.577662000  | -1.523147000 |
| C | -0.368396000 | 2.491726000  | 3.394124000  |
| H | 0.514150000  | 3.097401000  | 3.577212000  |
| C | -2.637788000 | 0.937649000  | 2.894595000  |
| H | -3.532344000 | 0.353200000  | 2.710609000  |
| C | -2.333079000 | -3.122122000 | -1.764972000 |
| H | -3.057756000 | -3.378327000 | -0.990873000 |
| H | -2.391413000 | -3.893131000 | -2.544768000 |
| H | -2.659598000 | -2.181988000 | -2.217969000 |
| C | -3.613857000 | -1.589361000 | 1.043256000  |
| H | -2.857367000 | -1.859939000 | 1.774850000  |
| C | -5.529494000 | -0.964209000 | -0.880758000 |
| H | -6.268849000 | -0.723834000 | -1.639073000 |
| C | -1.337089000 | 2.333505000  | 4.390159000  |
| H | -1.210024000 | 2.814354000  | 5.355497000  |
| C | -2.470480000 | 1.562361000  | 4.134410000  |
| H | -3.234296000 | 1.446555000  | 4.898137000  |
| C | -4.805957000 | -2.309103000 | 0.991100000  |
| H | -4.978109000 | -3.119024000 | 1.694049000  |
| C | -5.766577000 | -1.999651000 | 0.023737000  |
| H | -6.691155000 | -2.566960000 | -0.026312000 |
| H | -3.603513000 | 2.452268000  | 0.150238000  |
| H | 0.079114000  | 0.273752000  | -1.804820000 |
| B | 1.584304000  | 1.525709000  | -2.643871000 |
| H | 2.167921000  | 0.570027000  | -3.085580000 |
| H | 1.740980000  | 2.580625000  | -3.197953000 |
| H | 2.398174000  | 1.743109000  | -1.503580000 |
| N | 1.274178000  | -0.699312000 | 1.580502000  |
| H | 0.802215000  | -0.205446000 | 2.336499000  |
| H | 1.803164000  | -1.456839000 | 2.007276000  |
| C | -4.030533000 | 4.922654000  | -0.935216000 |
| H | -3.635619000 | 5.885942000  | -0.591070000 |
| H | -4.628372000 | 5.124679000  | -1.832587000 |
| H | -4.708831000 | 4.547172000  | -0.163114000 |
| C | 7.136666000  | -0.284424000 | 0.632875000  |

|   |             |              |              |
|---|-------------|--------------|--------------|
| C | 6.820265000 | 0.957262000  | 0.097522000  |
| C | 5.490455000 | 1.404108000  | 0.020706000  |
| C | 4.421624000 | 0.570892000  | 0.490484000  |
| C | 4.779999000 | -0.675766000 | 1.070520000  |
| C | 6.100313000 | -1.093518000 | 1.130121000  |
| H | 5.934009000 | 3.422231000  | -0.686266000 |
| H | 8.167903000 | -0.620508000 | 0.678779000  |
| H | 7.609022000 | 1.611192000  | -0.269768000 |
| C | 5.136618000 | 2.721497000  | -0.446976000 |
| H | 3.995204000 | -1.311283000 | 1.469022000  |
| H | 6.334184000 | -2.061282000 | 1.567488000  |
| C | 2.786888000 | 2.086349000  | -0.284149000 |
| C | 3.839496000 | 3.082704000  | -0.551564000 |
| H | 2.003646000 | -0.010083000 | 1.140552000  |
| H | 1.815397000 | 2.509571000  | -0.004242000 |
| H | 3.544229000 | 4.065766000  | -0.906225000 |
| N | 3.114164000 | 0.956699000  | 0.445432000  |

#### Int2<sub>1</sub>

|    |              |              |              |
|----|--------------|--------------|--------------|
| Co | 0.108468000  | -1.407848000 | 0.254579000  |
| P  | -1.492071000 | 0.157807000  | 0.251662000  |
| N  | 0.724425000  | 1.239470000  | -1.873889000 |
| C  | 1.526156000  | -2.473090000 | -1.147214000 |
| C  | 0.321602000  | -2.283744000 | -1.861917000 |
| C  | -0.439412000 | 2.011477000  | -1.726799000 |
| C  | 1.206277000  | -3.224897000 | 0.037272000  |
| C  | -2.586678000 | 2.527249000  | -0.702880000 |
| C  | -1.484784000 | 1.656369000  | -0.840191000 |
| C  | -0.185730000 | -3.607202000 | -0.020068000 |
| C  | -1.767056000 | 1.002337000  | 1.884745000  |
| C  | -3.122464000 | -0.644349000 | -0.064488000 |
| C  | -0.580215000 | 3.206790000  | -2.465246000 |
| H  | 0.205848000  | 3.488159000  | -3.154241000 |
| C  | -0.733186000 | -3.012278000 | -1.173803000 |
| C  | -2.721475000 | 3.705135000  | -1.427344000 |
| C  | 2.910127000  | -2.035988000 | -1.531613000 |
| H  | 2.922075000  | -1.568847000 | -2.517178000 |
| H  | 3.586379000  | -2.898886000 | -1.563366000 |
| H  | 3.333928000  | -1.321436000 | -0.822950000 |
| C  | -0.892602000 | -4.480196000 | 0.975428000  |
| H  | -0.570025000 | -4.254575000 | 1.997120000  |
| H  | -0.692059000 | -5.544842000 | 0.796889000  |
| H  | -1.975646000 | -4.336211000 | 0.931026000  |
| C  | -0.714061000 | 1.779927000  | 2.395660000  |
| H  | 0.218210000  | 1.844773000  | 1.851420000  |
| C  | 2.214223000  | -3.724985000 | 1.029238000  |

|   |              |              |              |
|---|--------------|--------------|--------------|
| H | 3.053961000  | -3.030983000 | 1.121351000  |
| H | 2.623294000  | -4.695211000 | 0.718627000  |
| H | 1.771238000  | -3.864360000 | 2.020512000  |
| C | 0.139404000  | -1.650830000 | -3.212247000 |
| H | -0.707226000 | -0.956994000 | -3.226109000 |
| H | -0.056751000 | -2.417696000 | -3.973087000 |
| H | 1.022863000  | -1.089998000 | -3.519492000 |
| C | -1.687619000 | 4.023863000  | -2.323130000 |
| H | -1.750067000 | 4.935900000  | -2.912400000 |
| C | -3.969393000 | -0.323395000 | -1.132170000 |
| H | -3.699591000 | 0.468404000  | -1.822059000 |
| C | -0.851157000 | 2.468297000  | 3.599471000  |
| H | -0.021473000 | 3.060266000  | 3.974871000  |
| C | -2.967099000 | 0.943718000  | 2.607305000  |
| H | -3.805994000 | 0.368803000  | 2.233077000  |
| C | -2.087454000 | -3.250789000 | -1.768972000 |
| H | -2.807322000 | -3.610729000 | -1.033412000 |
| H | -2.014969000 | -4.006495000 | -2.562684000 |
| H | -2.502209000 | -2.347369000 | -2.221084000 |
| C | -3.488855000 | -1.689506000 | 0.802499000  |
| H | -2.818271000 | -1.974072000 | 1.608425000  |
| C | -5.165283000 | -1.023174000 | -1.319840000 |
| H | -5.808044000 | -0.768456000 | -2.157603000 |
| C | -2.047898000 | 2.396053000  | 4.315917000  |
| H | -2.156942000 | 2.931457000  | 5.254580000  |
| C | -3.103311000 | 1.634903000  | 3.814119000  |
| H | -4.042132000 | 1.578801000  | 4.358017000  |
| C | -4.692635000 | -2.368552000 | 0.628337000  |
| H | -4.966054000 | -3.165010000 | 1.314569000  |
| C | -5.534693000 | -2.038087000 | -0.438035000 |
| H | -6.467914000 | -2.574448000 | -0.582582000 |
| H | -3.365527000 | 2.266648000  | 0.008201000  |
| H | 0.726699000  | 0.396592000  | -1.302966000 |
| B | 1.895850000  | 1.491192000  | -2.617864000 |
| H | 2.753135000  | 0.671047000  | -2.592686000 |
| H | 1.994342000  | 2.456845000  | -3.309318000 |
| H | 1.371303000  | 2.575233000  | 0.271089000  |
| N | 0.881905000  | -0.881871000 | 1.867393000  |
| H | 0.288634000  | -0.473000000 | 2.584589000  |
| H | 1.430973000  | -1.609623000 | 2.319949000  |
| C | -3.917508000 | 4.610487000  | -1.260247000 |
| H | -3.615697000 | 5.613041000  | -0.935383000 |
| H | -4.462886000 | 4.729508000  | -2.204000000 |
| H | -4.617080000 | 4.216336000  | -0.517696000 |
| C | 6.736827000  | -0.195978000 | 0.438403000  |
| C | 6.315137000  | 0.970370000  | -0.200415000 |

|   |             |              |              |
|---|-------------|--------------|--------------|
| C | 5.004429000 | 1.440838000  | -0.066774000 |
| C | 4.078215000 | 0.712802000  | 0.731852000  |
| C | 4.512035000 | -0.460808000 | 1.378139000  |
| C | 5.823673000 | -0.905741000 | 1.225848000  |
| H | 5.141600000 | 3.076717000  | -1.516637000 |
| H | 7.758112000 | -0.545997000 | 0.326416000  |
| H | 7.008426000 | 1.531830000  | -0.823208000 |
| C | 4.505445000 | 2.620022000  | -0.761542000 |
| H | 3.808010000 | -1.005085000 | 1.999093000  |
| H | 6.137637000 | -1.813008000 | 1.735804000  |
| C | 2.420445000 | 2.522764000  | 0.578956000  |
| C | 3.289474000 | 3.128169000  | -0.494862000 |
| H | 2.095277000 | 0.501077000  | 1.254964000  |
| H | 2.500829000 | 3.123384000  | 1.510518000  |
| H | 2.921451000 | 4.012485000  | -1.007039000 |
| N | 2.771587000 | 1.129113000  | 0.793136000  |
